# Supplementary material for: Ducting of incoherent scatter radar waves by field-aligned irregularities
Source: Copernicus journal article supplement (doi:10.5194/angeo-38-1101-2020), 2020-10-22
Supplement: Supplementary file 1 [file angeo-38-1101-2020-supplement.pdf]

Supplement of Ann. Geophys., 38, 1101–1113, 2020  
<https://doi.org/10.5194/angeo-38-1101-2020-supplement>  
© Author(s) 2020. This work is distributed under  
the Creative Commons Attribution 4.0 License.

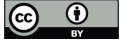

*Supplement of*

## **Ducting of incoherent scatter radar waves by field-aligned irregularities**

**Michael T. Rietveld and Andrew Senior**

*Correspondence to:* Michael T. Rietveld ([mike.rietveld@eiscat.uit.no](mailto:mike.rietveld@eiscat.uit.no))

The copyright of individual parts of the supplement might differ from the CC BY 4.0 License.

1 This supplement shows the results of the search for WAILES as described in  
2 Section 2 of the paper "Ducting of incoherent scatter radar waves by field-aligned  
irregularities"

3 by M. T. Rietveld and A. Senior

4  
5 This supplement should be useful for further studies of the WAILE phenomena  
6 using EISCAT UHF radar data.

7  
8 We highlight here two dates where WAILES were observed at the unusually low  
9 HF frequency of 4.544 MHz for this phenomenon:

10 2013-02-18 15:30-17:00

11 2012-02-12

12 -----

13  
14  
15 al\_heating\_all\_annotated.log

16 =====

17 # Line format:

18 # YYYY-mm-dd HH min\_f\_heat max\_foF2 status1 statusO statusX notes

19 # status1 is:

20 # X Experiment unsuitable

21 # Q Radar quick-look plot unavailable/unsuitable

22 # Y WAILES observed

23 # N No WAILES observed

24 # U Unclear

25 #

26 # statusO and statusX are (for O- and X-mode respectively):

27 # Y WAILES observed

28 # N No WAILES observed

29 # U Unclear

30 # - polarisation not used

31 # anything else is meaningless

32 #

33 # max\_foF2 = NaN indicates no data in the hour

34 #

35 2001-02-16 16 6.2000 NaN Q Q Q

36

37 2001-02-17 16 5.4230 NaN Q Q Q

38

39 2001-02-20 17 6.2000 7.2 Q Q Q

40

41 2001-11-08 15 6.2000 9.1 U U -

42 2001-11-08 16 6.2000 7.9 U U -

43 2001-11-08 17 5.4230 7.0 U U -

44 2001-11-08 18 5.4230 5.4 U U -

45

46 2001-11-09 15 7.9530 8.8 U U -

47 2001-11-09 16 5.4230 7.2 U U -

48 2001-11-09 17 5.4230 6.4 U U -

49

50 2001-11-10 15 6.7700 8.0 U U -

51 2001-11-10 16 6.7700 7.3 U U -

52 2001-11-10 17 5.4230 6.3 U U -

53

54 2001-11-11 15 5.4230 8.7 Y Y -

55 2001-11-11 16 5.4230 7.8 Y Y -

56 2001-11-11 17 5.4230 6.6 Y Y -

57

58 2001-11-12 15 5.4230 8.9 U U -

59 2001-11-12 16 5.4230 8.4 U U -

60 2001-11-12 17 5.4230 7.5 U U - heater scanning

61 2001-11-12 18 5.4230 6.0 U U -

62

63 2001-11-17 10 5.4230 10.6 X X X D-region

64 2001-11-17 11 5.4230 11.6 X X X

65 2001-11-17 12 5.4230 NaN X X X

66  
67 2002-03-05 17 5.4230 5.8 U U - disturbed conditions  
68 2002-03-05 20 5.4230 5.7 U U -  
69  
70 2002-03-06 17 5.4230 5.3 U U - disturbed conditions  
71 2002-03-06 18 5.4230 4.9 U U -  
72 2002-03-06 19 5.4230 5.9 U U -  
73  
74 2002-03-07 17 5.4230 9.4 U U -  
75 2002-03-07 18 5.2830 9.4 U U -  
76 2002-03-07 19 5.2830 5.8 U U -  
77  
78 2002-03-08 17 5.4230 8.7 U U -  
79 2002-03-08 18 6.9600 8.8 Y Y -  
80 2002-03-08 19 6.5500 5.8 U U -  
81 2002-03-08 20 5.4230 5.7 U U -  
82 2002-03-08 21 5.3030 5.1 Y Y -  
83  
84 2002-03-09 17 5.4230 5.8 U U - disturbed conditions  
85 2002-03-09 18 5.4230 5.8 U U -  
86 2002-03-09 19 5.4230 5.8 U U -  
87 2002-03-09 20 5.4230 4.7 U U -  
88 2002-03-09 21 5.4230 5.2 U U -  
89  
90 2002-03-10 18 5.4230 7.2 Y Y -  
91 2002-03-10 19 5.4230 6.3 Y Y -  
92  
93 2002-07-22 09 5.4230 6.3 X X X PMSE  
94 2002-07-22 10 5.4230 6.4 X X X  
95 2002-07-22 11 5.4230 6.7 X X X  
96 2002-07-22 12 5.4230 6.7 X X X  
97 2002-07-22 13 5.4230 6.1 X X X  
98 2002-07-22 14 5.4230 5.3 X X X  
99 2002-07-22 15 5.4230 5.9 X X X  
100 2002-07-22 21 5.4230 0.0 X X X  
101 2002-07-22 22 5.4230 0.0 X X X  
102 2002-07-22 23 7.9530 0.0 X X X  
103 2002-07-24 00 5.4230 0.0 X X X  
104 2002-07-24 06 5.4230 6.1 X X X  
105 2002-07-24 07 5.4230 6.1 X X X  
106 2002-07-24 08 5.4230 6.0 X X X  
107 2002-07-24 09 5.4230 5.9 X X X  
108 2002-07-24 10 5.4230 6.0 X X X  
109 2002-07-24 11 5.4230 6.1 X X X  
110 2002-07-24 12 5.4230 6.0 X X X  
111 2002-07-24 14 5.4230 5.8 X X X  
112 2002-07-24 22 5.4230 5.6 X X X  
113 2002-07-25 10 5.4230 6.1 X X X  
114 2002-07-25 11 5.4230 6.2 X X X  
115 2002-07-25 12 5.4230 6.0 X X X  
116 2002-07-25 13 5.4230 6.0 X X X  
117 2002-08-01 12 5.4230 5.6 X X X PMSE  
118 2002-08-01 13 5.4230 5.5 X X X  
119 2002-08-02 12 5.4230 5.1 X X X  
120 2002-09-25 11 7.9500 9.5 X X X tune  
121  
122 2002-09-25 12 7.9500 8.9 U U - radar scanning  
123 2002-09-25 13 6.2000 9.3 U U -  
124 2002-09-25 14 6.2000 9.5 U U -  
125 2002-09-25 16 7.1000 9.3 U U -  
126 2002-09-25 17 7.1000 9.0 U U -  
127  
128 2002-09-26 12 7.1000 9.8 U U - radar scanning  
129 2002-09-26 13 7.1000 10.0 U U -  
130 2002-09-26 14 7.1000 10.0 U U -  
131 2002-09-26 15 7.1000 10.6 Q Q Q

|     |            |    |        |      |   |   |                        |
|-----|------------|----|--------|------|---|---|------------------------|
| 132 | 2002-09-26 | 16 | 7.1000 | 9.3  | U | U | -                      |
| 133 | 2002-09-26 | 17 | 7.1000 | 7.7  | U | U | -                      |
| 134 |            |    |        |      |   |   |                        |
| 135 | 2002-09-28 | 12 | 7.9500 | 10.3 | U | U | - radar scanning       |
| 136 | 2002-09-28 | 13 | 7.9500 | 10.3 | U | U | -                      |
| 137 | 2002-09-28 | 17 | 7.9500 | 8.0  | U | U | -                      |
| 138 |            |    |        |      |   |   |                        |
| 139 | 2002-11-08 | 15 | 5.3030 | NaN  | U | U | -                      |
| 140 | 2002-11-08 | 16 | 5.3740 | NaN  | U | U | -                      |
| 141 |            |    |        |      |   |   |                        |
| 142 | 2003-03-06 | 08 | 5.4230 | 6.5  | X | X | X D-region             |
| 143 | 2003-03-06 | 09 | 5.4230 | 7.3  | X | X | X                      |
| 144 | 2003-03-06 | 10 | 5.4230 | 7.7  | X | X | X                      |
| 145 | 2003-03-06 | 11 | 6.7700 | 7.7  | X | X | X                      |
| 146 | 2003-03-06 | 12 | 5.4230 | 7.4  | X | X | X                      |
| 147 | 2003-03-06 | 13 | 6.2000 | 7.5  | X | X | X                      |
| 148 | 2003-03-06 | 14 | 6.2000 | 5.4  | X | X | X                      |
| 149 | 2003-03-06 | 15 | 6.2000 | 7.2  | X | X | X                      |
| 150 | 2003-06-20 | 12 | 5.4230 | 6.2  | X | X | X short pulses         |
| 151 | 2003-06-27 | 08 | 5.4230 | 4.9  | X | X | X PMSE?                |
| 152 | 2003-06-27 | 09 | 5.4230 | 5.5  | X | X | X                      |
| 153 | 2003-06-30 | 07 | 5.4230 | NaN  | X | X | X PMSE?                |
| 154 | 2003-06-30 | 08 | 5.4230 | NaN  | X | X | X                      |
| 155 | 2003-06-30 | 09 | 5.4230 | 5.2  | X | X | X                      |
| 156 | 2003-06-30 | 10 | 5.4230 | 5.4  | X | X | X                      |
| 157 | 2003-07-01 | 05 | 5.4230 | 4.9  | X | X | X PMSE                 |
| 158 | 2003-07-01 | 06 | 5.4230 | 5.5  | X | X | X                      |
| 159 | 2003-07-01 | 07 | 5.4230 | 5.3  | X | X | X                      |
| 160 | 2003-07-01 | 08 | 5.4230 | 5.5  | X | X | X                      |
| 161 | 2003-07-01 | 09 | 5.4230 | 5.5  | X | X | X                      |
| 162 | 2003-07-01 | 10 | 5.4230 | 5.6  | X | X | X                      |
| 163 | 2003-07-01 | 11 | 5.4230 | 5.7  | X | X | X                      |
| 164 | 2003-07-02 | 07 | 5.4230 | 5.8  | X | X | X PMSE                 |
| 165 | 2003-07-02 | 08 | 5.4230 | 6.2  | X | X | X                      |
| 166 | 2003-07-02 | 09 | 5.4230 | 6.3  | X | X | X                      |
| 167 | 2003-07-02 | 10 | 5.4230 | 6.5  | X | X | X                      |
| 168 | 2003-08-01 | 10 | 5.4230 | 4.9  | X | X | X PMSE?                |
| 169 | 2003-08-04 | 07 | 5.4230 | 5.8  | X | X | X PMSE?                |
| 170 | 2003-08-04 | 08 | 5.4230 | 6.4  | X | X | X                      |
| 171 | 2003-08-04 | 09 | 5.4230 | 6.0  | X | X | X                      |
| 172 | 2003-08-04 | 10 | 5.4230 | 6.1  | X | X | X                      |
| 173 | 2003-08-04 | 11 | 5.4230 | 6.3  | X | X | X                      |
| 174 | 2003-11-06 | 09 | 5.4230 | 6.6  | X | X | X short pulses (LT)    |
| 175 | 2003-11-06 | 11 | 6.2000 | 7.9  | X | X | X                      |
| 176 | 2003-11-06 | 12 | 6.2000 | 6.9  | X | X | X                      |
| 177 |            |    |        |      |   |   |                        |
| 178 | 2003-11-20 | 20 | 5.4230 | 7.7  | U | U | - disturbed conditions |
| 179 | 2003-11-20 | 21 | 5.4230 | 10.1 | U | U | -                      |
| 180 |            |    |        |      |   |   |                        |
| 181 | 2003-11-22 | 19 | 5.4230 | 7.8  | U | U | - disturbed conditions |
| 182 | 2003-11-22 | 20 | 5.4230 | 7.9  | U | U | -                      |
| 183 |            |    |        |      |   |   |                        |
| 184 | 2003-11-24 | 14 | 5.4230 | 5.3  | X | X | X D-region             |
| 185 | 2003-11-24 | 21 | 5.4230 | 6.5  | X | X | X 3 Hz                 |
| 186 | 2003-11-25 | 14 | 5.4230 | 5.2  | X | X | X D-region             |
| 187 | 2003-11-27 | 14 | 5.4230 | 6.4  | X | X | X no UHF               |
| 188 | 2003-11-27 | 15 | 5.4230 | 5.5  | X | X | X                      |
| 189 | 2004-02-26 | 14 | 5.4230 | 6.2  | X | X | X no UHF               |
| 190 | 2004-05-12 | 12 | 5.4230 | 5.4  | X | X | X test                 |
| 191 |            |    |        |      |   |   |                        |
| 192 | 2004-06-09 | 12 | 5.4230 | 5.4  | U | U | - radar scanning       |
| 193 |            |    |        |      |   |   |                        |
| 194 | 2004-06-10 | 21 | 5.4230 | 0.0  | X | X | X MARE                 |
| 195 | 2004-06-12 | 13 | 5.4230 | 6.1  | X | X | X short pulses         |
| 196 | 2004-06-12 | 15 | 5.4230 | 6.0  | X | X | X                      |
| 197 |            |    |        |      |   |   |                        |

|     |            |    |        |     |   |   |                                    |
|-----|------------|----|--------|-----|---|---|------------------------------------|
| 198 | 2004-06-12 | 16 | 5.4230 | 5.6 | U | U | - radar scanning                   |
| 199 |            |    |        |     |   |   |                                    |
| 200 | 2004-06-12 | 17 | 5.4230 | 5.7 | X | X | X unsuitable UHF data              |
| 201 | 2004-06-12 | 18 | 5.4230 | 5.5 | X | X | X                                  |
| 202 | 2004-06-30 | 10 | 5.4230 | 5.8 | X | X | X PMSE                             |
| 203 | 2004-06-30 | 11 | 5.4230 | 5.4 | X | X | X                                  |
| 204 | 2004-06-30 | 12 | 5.4230 | 5.5 | X | X | X                                  |
| 205 | 2004-06-30 | 13 | 5.4230 | 5.4 | X | X | X                                  |
| 206 | 2004-07-02 | 09 | 5.4230 | 5.2 | X | X | X PMSE                             |
| 207 | 2004-07-02 | 10 | 5.4230 | 5.3 | X | X | X                                  |
| 208 | 2004-07-02 | 11 | 5.4230 | 5.3 | X | X | X                                  |
| 209 | 2004-07-02 | 12 | 5.4230 | 5.3 | X | X | X                                  |
| 210 | 2004-07-05 | 07 | 5.4230 | 5.7 | X | X | X PMSE                             |
| 211 | 2004-07-05 | 08 | 5.4230 | NaN | X | X | X                                  |
| 212 | 2004-07-05 | 09 | 5.4230 | NaN | X | X | X                                  |
| 213 | 2004-07-05 | 10 | 5.4230 | NaN | X | X | X                                  |
| 214 | 2004-07-06 | 08 | 5.4230 | 5.7 | X | X | X PMSE                             |
| 215 | 2004-07-06 | 09 | 5.4230 | NaN | X | X | X                                  |
| 216 | 2004-07-06 | 10 | 5.4230 | 5.4 | X | X | X                                  |
| 217 | 2004-07-06 | 11 | 5.4230 | 5.6 | X | X | X                                  |
| 218 | 2004-07-07 | 07 | 5.4230 | 5.6 | X | X | X PMSE                             |
| 219 | 2004-07-07 | 08 | 5.4230 | 5.5 | X | X | X                                  |
| 220 | 2004-07-07 | 09 | 5.4230 | 5.5 | X | X | X                                  |
| 221 | 2004-07-07 | 10 | 5.4230 | 6.7 | X | X | X                                  |
| 222 | 2004-07-07 | 11 | 5.4230 | 5.7 | X | X | X                                  |
| 223 | 2004-07-08 | 07 | 5.4230 | 5.6 | X | X | X PMSE                             |
| 224 | 2004-07-08 | 08 | 5.4230 | NaN | X | X | X                                  |
| 225 | 2004-07-08 | 09 | 5.4230 | NaN | X | X | X                                  |
| 226 | 2004-07-08 | 10 | 5.4230 | NaN | X | X | X                                  |
| 227 | 2004-07-10 | 07 | 5.4230 | 5.4 | X | X | X PMSE                             |
| 228 | 2004-07-10 | 08 | 5.4230 | 5.7 | X | X | X                                  |
| 229 | 2004-07-10 | 09 | 5.4230 | 6.4 | X | X | X                                  |
| 230 | 2004-07-10 | 10 | 5.4230 | 6.0 | X | X | X                                  |
| 231 | 2004-07-10 | 11 | 5.4230 | 5.5 | X | X | X                                  |
| 232 | 2004-07-11 | 07 | 5.4230 | 5.4 | X | X | X PMSE                             |
| 233 | 2004-07-11 | 08 | 5.4230 | 5.7 | X | X | X                                  |
| 234 | 2004-07-11 | 09 | 5.4230 | 6.0 | X | X | X                                  |
| 235 | 2004-07-11 | 10 | 5.4230 | 5.8 | X | X | X                                  |
| 236 | 2004-07-12 | 07 | 5.4230 | 5.0 | X | X | X PMSE                             |
| 237 | 2004-07-12 | 08 | 5.4230 | 4.8 | X | X | X                                  |
| 238 | 2004-07-12 | 09 | 5.4230 | 4.9 | X | X | X                                  |
| 239 | 2004-07-12 | 10 | 5.4230 | 5.1 | X | X | X                                  |
| 240 | 2004-07-12 | 11 | 5.4230 | 5.3 | X | X | X                                  |
| 241 | 2004-07-13 | 07 | 5.4230 | 5.1 | X | X | X PMSE                             |
| 242 | 2004-07-13 | 08 | 5.4230 | 5.0 | X | X | X                                  |
| 243 | 2004-07-14 | 07 | 6.9600 | 6.5 | X | X | X PMSE                             |
| 244 | 2004-07-14 | 08 | 5.4230 | 6.4 | X | X | X                                  |
| 245 | 2004-07-14 | 09 | 5.4230 | 6.4 | X | X | X                                  |
| 246 | 2004-07-14 | 10 | 5.4230 | 6.3 | X | X | X                                  |
| 247 | 2004-07-15 | 07 | 5.4230 | 5.6 | X | X | X PMSE                             |
| 248 | 2004-07-15 | 08 | 5.4230 | 6.2 | X | X | X                                  |
| 249 | 2004-07-15 | 09 | 5.4230 | 6.7 | X | X | X                                  |
| 250 | 2004-07-15 | 10 | 5.4230 | 6.0 | X | X | X                                  |
| 251 | 2004-07-15 | 11 | 5.4230 | 5.6 | X | X | X                                  |
| 252 | 2004-10-01 | 14 | 6.2000 | 7.2 | X | X | X short pulses                     |
| 253 | 2004-10-01 | 15 | 5.4230 | 7.1 | X | X | X unsuitable UHF data              |
| 254 | 2004-10-01 | 16 | 5.4230 | 7.1 | X | X | X                                  |
| 255 | 2004-10-02 | 11 | 6.2000 | 7.5 | X | X | X short pulses                     |
| 256 | 2004-10-02 | 12 | 6.2000 | 7.4 | X | X | X                                  |
| 257 | 2004-10-02 | 13 | 6.2000 | 7.5 | X | X | X                                  |
| 258 | 2004-10-05 | 10 | 5.4230 | 5.5 | X | X | X short pulses/unsuitable UHF data |
| 259 | 2004-10-05 | 11 | 5.4230 | 5.8 | X | X | X                                  |
| 260 | 2004-10-05 | 12 | 5.4230 | 5.9 | X | X | X                                  |
| 261 | 2004-10-07 | 11 | 5.4230 | 9.2 | X | X | X unsuitable UHF data              |
| 262 | 2004-10-07 | 12 | 5.4230 | 7.7 | X | X | X no UHF                           |
| 263 | 2004-10-07 | 13 | 5.4230 | 6.7 | X | X | X                                  |

|     |            |    |        |      |   |   |   |                     |
|-----|------------|----|--------|------|---|---|---|---------------------|
| 264 | 2004-10-07 | 14 | 5.4230 | 6.0  | X | X | X |                     |
| 265 | 2004-10-07 | 15 | 5.4230 | 6.3  | X | X | X |                     |
| 266 | 2004-10-07 | 16 | 5.4230 | 10.3 | X | X | X |                     |
| 267 | 2004-10-08 | 11 | 5.4230 | 5.9  | X | X | X | unsuitable UHF data |
| 268 | 2004-10-08 | 12 | 5.4230 | 6.5  | X | X | X |                     |
| 269 | 2004-10-08 | 13 | 5.4230 | 6.3  | X | X | X |                     |
| 270 | 2005-06-01 | 08 | 5.4230 | 0.0  | X | X | X | no UHF              |
| 271 | 2005-06-01 | 09 | 5.4230 | 0.0  | X | X | X |                     |
| 272 | 2005-06-01 | 10 | 5.4230 | 0.0  | X | X | X |                     |
| 273 | 2005-06-01 | 11 | 5.4230 | 0.0  | X | X | X |                     |
| 274 | 2005-06-01 | 12 | 5.4230 | 0.0  | X | X | X |                     |
| 275 | 2005-06-01 | 13 | 5.4230 | 0.0  | X | X | X |                     |
| 276 | 2005-06-29 | 08 | 5.4230 | 4.9  | X | X | X |                     |
| 277 | 2005-06-29 | 09 | 5.4230 | 5.3  | X | X | X |                     |
| 278 | 2005-07-04 | 07 | 5.4230 | 5.5  | X | X | X | PMSE                |
| 279 | 2005-07-04 | 08 | 5.4230 | 5.5  | X | X | X |                     |
| 280 | 2005-07-04 | 09 | 5.4230 | 5.7  | X | X | X |                     |
| 281 | 2005-07-04 | 10 | 5.4230 | 5.7  | X | X | X |                     |
| 282 | 2005-07-04 | 11 | 5.4230 | 5.4  | X | X | X |                     |
| 283 | 2005-07-04 | 12 | 5.4230 | 5.3  | X | X | X |                     |
| 284 | 2005-07-05 | 07 | 5.4230 | 6.1  | X | X | X |                     |
| 285 | 2005-07-05 | 08 | 5.4230 | 6.0  | X | X | X |                     |
| 286 | 2005-07-05 | 09 | 5.4230 | NaN  | X | X | X |                     |
| 287 | 2005-07-05 | 10 | 5.4230 | NaN  | X | X | X |                     |
| 288 | 2005-07-05 | 11 | 5.4230 | NaN  | X | X | X |                     |
| 289 | 2005-07-05 | 12 | 5.4230 | 5.5  | X | X | X |                     |
| 290 | 2005-07-06 | 07 | 5.4230 | 6.6  | X | X | X |                     |
| 291 | 2005-07-06 | 08 | 5.4230 | 6.0  | X | X | X |                     |
| 292 | 2005-07-06 | 09 | 5.4230 | 6.0  | X | X | X |                     |
| 293 | 2005-07-06 | 10 | 5.4230 | 5.8  | X | X | X |                     |
| 294 | 2005-07-07 | 09 | 5.4230 | 5.7  | X | X | X |                     |
| 295 | 2005-07-07 | 10 | 5.4230 | 5.5  | X | X | X |                     |
| 296 | 2005-07-07 | 11 | 5.4230 | 5.6  | X | X | X |                     |
| 297 | 2005-07-07 | 12 | 5.4230 | 5.8  | X | X | X |                     |
| 298 | 2005-07-08 | 07 | 5.4230 | 5.0  | X | X | X |                     |
| 299 | 2005-07-08 | 08 | 5.4230 | 5.7  | X | X | X |                     |
| 300 | 2005-07-08 | 09 | 5.4230 | 5.7  | X | X | X |                     |
| 301 | 2005-07-08 | 10 | 5.4230 | 5.4  | X | X | X |                     |
| 302 | 2005-07-08 | 11 | 5.4230 | 5.4  | X | X | X |                     |
| 303 | 2005-07-08 | 12 | 5.4230 | 5.4  | X | X | X |                     |
| 304 | 2005-07-09 | 07 | 5.4230 | 5.8  | X | X | X |                     |
| 305 | 2005-07-09 | 08 | 5.4230 | 6.4  | X | X | X |                     |
| 306 | 2005-07-09 | 09 | 5.4230 | 7.0  | X | X | X |                     |
| 307 | 2005-07-09 | 10 | 5.4230 | 7.5  | X | X | X |                     |
| 308 | 2005-07-09 | 11 | 5.4230 | 7.1  | X | X | X |                     |
| 309 | 2005-07-09 | 12 | 5.4230 | 6.8  | X | X | X |                     |
| 310 | 2005-07-10 | 07 | 5.4230 | 5.1  | X | X | X |                     |
| 311 | 2005-10-04 | 09 | 5.4230 | NaN  | X | X | X | D-region            |
| 312 | 2005-10-04 | 10 | 5.4230 | NaN  | X | X | X |                     |
| 313 | 2005-10-04 | 11 | 5.4230 | NaN  | X | X | X |                     |
| 314 | 2005-10-04 | 12 | 5.4230 | NaN  | X | X | X |                     |
| 315 | 2005-10-05 | 09 | 5.4230 | NaN  | X | X | X | No UHF              |
| 316 | 2005-10-05 | 10 | 5.4230 | NaN  | X | X | X |                     |
| 317 | 2005-10-05 | 11 | 5.4230 | NaN  | X | X | X |                     |
| 318 | 2005-10-05 | 12 | 5.4230 | NaN  | X | X | X |                     |
| 319 | 2005-10-05 | 13 | 5.4230 | NaN  | X | X | X |                     |
| 320 | 2005-10-05 | 14 | 5.4230 | NaN  | X | X | X |                     |
| 321 | 2005-10-07 | 08 | 5.4230 | NaN  | X | X | X | No UHF              |
| 322 | 2005-10-07 | 09 | 5.4230 | NaN  | X | X | X |                     |
| 323 | 2005-10-07 | 10 | 5.4230 | NaN  | X | X | X |                     |
| 324 | 2005-10-08 | 08 | 5.4230 | NaN  | X | X | X | No UHF              |
| 325 | 2005-10-08 | 09 | 5.4230 | NaN  | X | X | X |                     |
| 326 | 2005-10-08 | 10 | 5.4230 | NaN  | X | X | X |                     |
| 327 | 2005-10-08 | 11 | 5.4230 | NaN  | X | X | X |                     |
| 328 | 2005-10-08 | 16 | 5.4230 | NaN  | X | X | X |                     |
| 329 | 2005-10-08 | 17 | 5.4230 | NaN  | X | X | X |                     |

330 2005-10-08 18 5.4230 NaN X X X  
331 2005-10-10 08 5.4230 5.4 X X X No UHF  
332 2005-10-10 09 5.4230 5.6 X X X  
333 2005-10-10 10 5.4230 5.6 X X X  
334 2005-10-10 11 5.4230 6.0 X X X  
335 2005-10-10 12 5.4230 5.7 X X X  
336 2005-10-10 13 5.4230 5.4 X X X  
337 2005-10-11 11 5.4230 6.1 X X X unsuitable UHF data  
338 2005-10-12 13 5.3400 5.9 X X X unsuitable UHF data  
339 2005-10-12 14 5.3500 6.1 X X X  
340 2005-10-12 15 5.3400 5.6 X X X  
341 2005-10-13 09 5.4230 6.6 X X X unsuitable UHF data  
342 2005-10-13 10 5.4230 6.6 X X X  
343 2005-10-13 11 5.4230 6.9 X X X  
344 2005-10-13 12 6.2000 6.3 X X X  
345 2005-10-13 13 6.2000 6.3 X X X  
346 2005-12-07 11 5.4230 5.3 X X X test  
347  
348 2006-01-18 12 5.4230 5.9 U U -  
349  
350 2006-01-21 13 5.4230 5.4 X X X tune  
351 2006-01-21 14 5.4230 5.8 X X X no UHF  
352 2006-07-28 16 5.4230 NaN X X X PMSE  
353 2006-07-28 17 5.4230 NaN X X X  
354 2006-07-28 18 5.4230 NaN X X X  
355 2006-07-28 19 5.4230 NaN X X X  
356 2006-07-28 20 5.4230 NaN X X X  
357 2006-07-28 21 5.4230 NaN X X X  
358 2006-07-28 22 5.4230 NaN X X X  
359 2006-07-28 23 5.4230 NaN X X X  
360 2006-07-29 18 5.4230 NaN X X X PMSE  
361 2006-07-29 19 5.4230 NaN X X X  
362 2006-07-29 20 5.4230 NaN X X X  
363 2006-07-29 21 5.4230 NaN X X X  
364 2006-07-29 22 5.4230 NaN X X X  
365 2006-07-29 23 5.4230 NaN X X X  
366 2006-07-30 00 5.4230 4.9 X X X  
367 2006-08-03 18 5.4230 5.7 X X X PMSE  
368 2006-08-04 18 5.4230 4.9 X X X PMSE  
369 2006-08-04 19 5.4230 4.7 X X X  
370 2006-08-04 20 5.4230 5.6 X X X  
371 2006-08-04 21 5.4230 5.8 X X X  
372 2006-08-04 22 5.4230 5.6 X X X  
373 2006-08-04 23 5.4230 5.4 X X X  
374 2006-08-12 08 5.4230 NaN X X X PMSE  
375 2006-08-12 09 5.4230 NaN X X X  
376 2006-08-12 10 5.4230 NaN X X X  
377 2006-08-13 07 5.4230 NaN X X X PMSE  
378 2006-08-13 08 5.4230 NaN X X X  
379 2006-08-13 09 5.4230 NaN X X X  
380 2006-08-13 10 5.4230 NaN X X X  
381 2006-10-24 10 5.4230 6.0 X X X unsuitable UHF data  
382 2006-10-24 11 5.4230 6.4 X X X  
383 2006-10-24 12 5.4230 5.9 X X X  
384 2006-11-20 19 5.4230 0.0 X X X no UHF  
385 2006-11-21 16 5.4230 NaN X X X no UHF  
386 2006-11-21 17 5.4230 NaN X X X  
387 2006-11-21 18 5.4230 NaN X X X  
388 2006-11-24 08 5.4230 NaN X X X no UHF  
389 2006-11-24 09 5.4230 NaN X X X  
390 2006-11-27 10 5.4230 NaN X X X no UHF  
391 2006-12-08 10 5.4230 0.0 X X X PMWE  
392 2006-12-08 11 5.4230 0.0 X X X  
393 2006-12-08 12 5.4230 0.0 X X X  
394  
395 2007-02-23 09 5.4230 5.6 U U - radar scanning

|     |            |    |        |      |   |   |   |          |  |
|-----|------------|----|--------|------|---|---|---|----------|--|
| 396 |            |    |        |      |   |   |   |          |  |
| 397 | 2007-06-26 | 12 | 5.4230 | 5.6  | X | X | X | Test     |  |
| 398 | 2007-06-28 | 06 | 5.4230 | 4.8  | X | X | X | PMSE     |  |
| 399 | 2007-06-28 | 07 | 5.4230 | 4.9  | X | X | X |          |  |
| 400 | 2007-06-28 | 08 | 5.4230 | 5.2  | X | X | X |          |  |
| 401 | 2007-06-28 | 09 | 5.4230 | 5.1  | X | X | X |          |  |
| 402 | 2007-06-28 | 10 | 5.4230 | 5.0  | X | X | X |          |  |
| 403 | 2007-06-28 | 11 | 5.4230 | 5.0  | X | X | X |          |  |
| 404 | 2007-07-10 | 07 | 5.4230 | 5.2  | X | X | X | PMSE     |  |
| 405 | 2007-07-10 | 08 | 5.4230 | 5.6  | X | X | X |          |  |
| 406 | 2007-07-10 | 09 | 5.4230 | 5.1  | X | X | X |          |  |
| 407 | 2007-07-10 | 10 | 5.4230 | 5.0  | X | X | X |          |  |
| 408 | 2007-07-12 | 13 | 5.4230 | 4.9  | X | X | X | PMSE     |  |
| 409 | 2007-07-13 | 07 | 5.4230 | 5.0  | X | X | X | PMSE     |  |
| 410 | 2007-07-13 | 08 | 5.4230 | 4.7  | X | X | X |          |  |
| 411 | 2007-07-13 | 09 | 5.4230 | 4.7  | X | X | X |          |  |
| 412 | 2007-07-13 | 11 | 5.4230 | 4.7  | X | X | X |          |  |
| 413 | 2007-07-13 | 12 | 5.4230 | 5.7  | X | X | X |          |  |
| 414 | 2007-07-17 | 16 | 7.9530 | 8.6  | X | X | X | Test     |  |
| 415 | 2007-07-18 | 07 | 7.9530 | 7.3  | X | X | X | PMSE     |  |
| 416 | 2007-07-18 | 08 | 7.9530 | 10.7 | X | X | X |          |  |
| 417 | 2007-07-18 | 09 | 7.9530 | 8.1  | X | X | X |          |  |
| 418 | 2007-07-18 | 10 | 5.4230 | 6.5  | X | X | X |          |  |
| 419 | 2007-07-18 | 11 | 5.4230 | 5.8  | X | X | X |          |  |
| 420 | 2007-07-18 | 12 | 5.4230 | 6.1  | X | X | X |          |  |
| 421 | 2007-07-19 | 07 | 5.4230 | 8.4  | X | X | X | PMSE     |  |
| 422 | 2007-07-19 | 08 | 5.4230 | 4.8  | X | X | X |          |  |
| 423 | 2007-07-19 | 09 | 5.4230 | 4.9  | X | X | X |          |  |
| 424 | 2007-08-29 | 12 | 5.4230 | 4.8  | X | X | X | Test     |  |
| 425 | 2007-10-10 | 09 | 5.4230 | 5.5  | X | X | X | D-region |  |
| 426 | 2007-10-11 | 09 | 5.4230 | 5.4  | X | X | X | D-region |  |
| 427 | 2007-10-11 | 10 | 5.4230 | 5.5  | X | X | X |          |  |
| 428 | 2007-10-11 | 10 | 5.4230 | 5.5  | X | X | X |          |  |
| 429 | 2007-10-11 | 11 | 5.4230 | 5.4  | X | X | X |          |  |
| 430 | 2007-10-11 | 12 | 5.4230 | 5.2  | X | X | X |          |  |
| 431 | 2007-10-13 | 08 | 5.4230 | 5.5  | X | X | X | D-region |  |
| 432 | 2007-10-13 | 09 | 5.4230 | 5.6  | X | X | X |          |  |
| 433 | 2007-10-13 | 10 | 5.4230 | 5.7  | X | X | X |          |  |
| 434 | 2007-10-13 | 11 | 5.4230 | 5.7  | X | X | X |          |  |
| 435 | 2007-10-13 | 12 | 5.4230 | 5.7  | X | X | X |          |  |
| 436 | 2007-10-14 | 08 | 5.4230 | 5.4  | X | X | X | D-region |  |
| 437 | 2007-10-14 | 09 | 5.4230 | 5.3  | X | X | X |          |  |
| 438 | 2007-10-14 | 10 | 5.4230 | 5.8  | X | X | X |          |  |
| 439 | 2007-10-14 | 11 | 5.4230 | 5.7  | X | X | X |          |  |
| 440 | 2007-10-14 | 12 | 5.4230 | 5.2  | X | X | X |          |  |
| 441 | 2007-10-15 | 09 | 5.4230 | 5.7  | X | X | X | D-region |  |
| 442 | 2007-10-15 | 10 | 5.4230 | 5.7  | X | X | X |          |  |
| 443 | 2007-10-15 | 11 | 5.4230 | 5.7  | X | X | X |          |  |
| 444 | 2007-10-16 | 09 | 5.4230 | 5.7  | X | X | X | D-region |  |
| 445 | 2007-10-16 | 10 | 5.4230 | 5.4  | X | X | X |          |  |
| 446 | 2007-10-16 | 11 | 5.4230 | 5.4  | X | X | X |          |  |
| 447 | 2007-10-17 | 09 | 5.4230 | 5.0  | X | X | X | D-region |  |
| 448 | 2007-10-17 | 10 | 5.4230 | 5.1  | X | X | X |          |  |
| 449 | 2007-10-17 | 11 | 5.4230 | 5.6  | X | X | X |          |  |
| 450 | 2007-10-18 | 09 | 5.4230 | 6.9  | X | X | X | D-region |  |
| 451 | 2007-10-18 | 10 | 5.4230 | 6.5  | X | X | X |          |  |
| 452 | 2007-10-18 | 11 | 5.4230 | 6.9  | X | X | X |          |  |
| 453 | 2007-10-19 | 09 | 5.4230 | 4.7  | X | X | X | D-region |  |
| 454 | 2007-10-19 | 10 | 5.4230 | 4.9  | X | X | X |          |  |
| 455 | 2007-10-19 | 11 | 5.4230 | 4.7  | X | X | X |          |  |
| 456 | 2008-02-05 | 09 | 5.4230 | 5.2  | X | X | X | PMWE     |  |
| 457 | 2008-02-05 | 10 | 5.4230 | 5.3  | X | X | X |          |  |
| 458 | 2008-02-05 | 11 | 5.4230 | NaN  | X | X | X |          |  |
| 459 | 2008-02-06 | 09 | 5.4230 | 4.8  | X | X | X | PMWE     |  |
| 460 | 2008-02-06 | 10 | 5.4230 | 5.3  | X | X | X |          |  |
| 461 | 2008-02-06 | 11 | 5.4230 | 5.3  | X | X | X |          |  |



|     |            |    |        |     |   |   |   |                      |
|-----|------------|----|--------|-----|---|---|---|----------------------|
| 462 | 2008-02-07 | 09 | 5.4230 | 4.8 | X | X | X | PMWE                 |
| 463 | 2008-02-07 | 10 | 5.4230 | 4.9 | X | X | X |                      |
| 464 | 2008-02-07 | 11 | 5.4230 | 4.9 | X | X | X |                      |
| 465 | 2008-02-08 | 11 | 5.4230 | 4.9 | X | X | X | PMWE                 |
| 466 | 2008-02-11 | 12 | 5.4230 | 4.9 | X | X | X | PMWE                 |
| 467 | 2008-02-11 | 13 | 5.4230 | 5.2 | X | X | X |                      |
| 468 | 2008-02-12 | 11 | 5.4230 | 4.6 | X | X | X | PMWE                 |
| 469 | 2008-02-12 | 12 | 5.4230 | 4.7 | X | X | X |                      |
| 470 | 2008-03-12 | 08 | 5.4230 | 0.0 | X | X | X | PMWE?                |
| 471 | 2008-03-12 | 09 | 5.4230 | 0.0 | X | X | X |                      |
| 472 | 2008-03-12 | 10 | 5.4230 | 0.0 | X | X | X |                      |
| 473 | 2008-05-27 | 09 | 5.4230 | 4.7 | X | X | X | PMSE                 |
| 474 | 2008-05-27 | 10 | 5.4230 | 4.9 | X | X | X |                      |
| 475 | 2008-05-27 | 11 | 5.4230 | 4.8 | X | X | X |                      |
| 476 | 2008-05-27 | 12 | 5.4230 | 4.6 | X | X | X |                      |
| 477 | 2008-05-27 | 14 | 5.4230 | NaN | X | X | X | Test                 |
| 478 | 2008-05-27 | 15 | 7.9530 | NaN | X | X | X |                      |
| 479 | 2008-05-27 | 16 | 5.4230 | NaN | X | X | X |                      |
| 480 | 2008-05-27 | 17 | 5.4230 | NaN | X | X | X |                      |
| 481 | 2008-05-27 | 18 | 5.4230 | NaN | X | X | X |                      |
| 482 | 2008-05-30 | 09 | 5.4230 | 4.8 | X | X | X | PMSE                 |
| 483 | 2008-05-30 | 10 | 5.4230 | 4.7 | X | X | X |                      |
| 484 | 2008-05-30 | 12 | 5.4230 | 4.7 | X | X | X |                      |
| 485 | 2008-05-30 | 13 | 5.4230 | 4.7 | X | X | X |                      |
| 486 | 2008-06-16 | 08 | 5.4230 | NaN | X | X | X | PMSE                 |
| 487 | 2008-06-17 | 07 | 5.4230 | NaN | X | X | X | Tune                 |
| 488 | 2008-06-17 | 08 | 5.4230 | NaN | X | X | X | PMSE                 |
| 489 | 2008-06-17 | 09 | 5.4230 | NaN | X | X | X |                      |
| 490 | 2008-06-17 | 10 | 5.4230 | NaN | X | X | X |                      |
| 491 | 2008-06-17 | 11 | 5.4230 | NaN | X | X | X |                      |
| 492 | 2008-06-18 | 07 | 5.4230 | NaN | X | X | X | Tune                 |
| 493 | 2008-06-19 | 10 | 5.4230 | 4.8 | X | X | X | PMSE                 |
| 494 | 2008-06-19 | 11 | 5.4230 | 4.7 | X | X | X |                      |
| 495 | 2008-06-26 | 08 | 5.4230 | NaN | X | X | X | PMSE                 |
| 496 | 2008-06-26 | 09 | 5.4230 | NaN | X | X | X |                      |
| 497 | 2008-06-26 | 10 | 5.4230 | NaN | X | X | X |                      |
| 498 | 2008-06-26 | 11 | 5.4230 | NaN | X | X | X |                      |
| 499 | 2008-06-28 | 09 | 5.4230 | NaN | X | X | X | XMOD                 |
| 500 | 2008-06-28 | 10 | 5.4230 | NaN | X | X | X |                      |
| 501 | 2008-06-28 | 11 | 5.4230 | NaN | X | X | X |                      |
| 502 | 2008-07-03 | 11 | 6.7700 | 0.0 | X | X | X | PMSE                 |
| 503 | 2008-09-29 | 12 | 5.4230 | 4.8 | X | X | X | Test                 |
| 504 | 2008-09-29 | 13 | 5.4230 | 4.9 | X | X | X |                      |
| 505 | 2008-09-29 | 14 | 5.4230 | 4.9 | X | X | X |                      |
| 506 |            |    |        |     |   |   |   |                      |
| 507 | 2008-10-27 | 13 | 5.4230 | 4.9 | U | - | U |                      |
| 508 |            |    |        |     |   |   |   |                      |
| 509 | 2008-10-31 | 11 | 5.4230 | 5.3 | Q | X | X | QL plot unsuitable   |
| 510 | 2008-10-31 | 12 | 6.2000 | 5.4 | Q | X | X |                      |
| 511 | 2008-10-31 | 13 | 5.4230 | 5.0 | Q | X | X |                      |
| 512 | 2008-10-31 | 14 | 5.4230 | 4.8 | Q | X | X |                      |
| 513 |            |    |        |     |   |   |   |                      |
| 514 | 2008-11-03 | 11 | 6.2000 | 5.4 | U | U | U |                      |
| 515 | 2008-11-03 | 13 | 5.4230 | 5.2 | U | U | U |                      |
| 516 |            |    |        |     |   |   |   |                      |
| 517 | 2008-11-04 | 12 | 6.2000 | 6.0 | Q | X | X | QL plot unsuitable   |
| 518 |            |    |        |     |   |   |   |                      |
| 519 | 2008-11-08 | 18 | 5.4230 | 5.9 | U | U | U | disturbed conditions |
| 520 | 2008-11-08 | 20 | 5.4230 | 5.8 | U | U | U |                      |
| 521 | 2008-11-08 | 21 | 5.4230 | 5.6 | U | U | U |                      |
| 522 | 2008-11-08 | 22 | 5.4230 | 5.8 | U | U | U |                      |
| 523 |            |    |        |     |   |   |   |                      |
| 524 | 2008-11-26 | 10 | 5.4230 | 4.8 | X | X | X | D-region             |
| 525 |            |    |        |     |   |   |   |                      |
| 526 | 2009-01-19 | 12 | 5.4230 | 4.9 | X | X | X | Test                 |
| 527 | 2009-05-15 | 17 | 5.4230 | 4.9 | X | X | X | Test                 |

|     |            |    |        |      |   |   |   |                |
|-----|------------|----|--------|------|---|---|---|----------------|
| 528 | 2009-05-16 | 19 | 5.4230 | 5.0  | X | X | X | Test           |
| 529 | 2009-05-19 | 09 | 5.4230 | 5.2  | X | X | X | Test           |
| 530 | 2009-05-19 | 12 | 5.4230 | 5.5  | X | X | X | Test           |
| 531 | 2009-07-22 | 10 | 5.4230 | 0.0  | X | X | X | PMSE           |
| 532 | 2009-07-22 | 11 | 5.4230 | NaN  | X | X | X |                |
| 533 | 2009-07-23 | 08 | 5.4230 | 0.0  | X | X | X | PMSE           |
| 534 | 2009-07-23 | 10 | 5.4230 | NaN  | X | X | X |                |
| 535 | 2009-07-23 | 11 | 5.4230 | NaN  | X | X | X |                |
| 536 | 2009-07-24 | 09 | 5.4230 | NaN  | X | X | X | PMSE           |
| 537 | 2009-07-24 | 10 | 5.4230 | NaN  | X | X | X |                |
| 538 | 2009-07-24 | 11 | 5.4230 | NaN  | X | X | X |                |
| 539 | 2009-07-27 | 10 | 5.4230 | NaN  | X | X | X |                |
| 540 | 2009-07-27 | 11 | 5.4230 | NaN  | X | X | X |                |
| 541 | 2009-07-28 | 09 | 5.4230 | NaN  | X | X | X | PMSE           |
| 542 | 2009-07-28 | 10 | 5.4230 | NaN  | X | X | X |                |
| 543 | 2009-07-28 | 11 | 5.4230 | NaN  | X | X | X |                |
| 544 | 2009-07-29 | 09 | 5.4230 | NaN  | X | X | X | Partial refl.  |
| 545 | 2009-07-30 | 09 | 5.4230 | NaN  | X | X | X | PMSE           |
| 546 | 2009-07-30 | 10 | 5.4230 | NaN  | X | X | X |                |
| 547 | 2009-07-30 | 11 | 5.4230 | NaN  | X | X | X |                |
| 548 | 2009-07-31 | 07 | 5.4230 | 4.7  | X | X | X | Tune           |
| 549 | 2009-07-31 | 09 | 5.4230 | NaN  | X | X | X | PMSE           |
| 550 | 2009-07-31 | 10 | 5.4230 | NaN  | X | X | X |                |
| 551 | 2009-07-31 | 11 | 5.4230 | NaN  | X | X | X |                |
| 552 | 2009-08-01 | 09 | 5.4230 | NaN  | X | X | X | Partial refl.  |
| 553 | 2009-08-01 | 10 | 5.4230 | NaN  | X | X | X |                |
| 554 | 2009-08-09 | 09 | 5.4230 | 4.7  | X | X | X | PMSE           |
| 555 | 2009-08-09 | 10 | 5.4230 | 4.7  | X | X | X |                |
| 556 | 2009-08-09 | 11 | 5.4230 | 4.8  | X | X | X |                |
| 557 | 2009-08-11 | 12 | 5.4230 | 4.6  | X | X | X | PMSE           |
| 558 | 2009-08-11 | 13 | 5.4230 | 4.7  | X | X | X |                |
| 559 | 2009-08-12 | 09 | 5.4230 | 4.9  | X | X | X | PMSE           |
| 560 | 2009-08-12 | 10 | 5.4230 | 4.8  | X | X | X |                |
| 561 | 2009-08-12 | 11 | 5.4230 | 4.9  | X | X | X |                |
| 562 | 2009-08-12 | 12 | 5.4230 | 4.9  | X | X | X |                |
| 563 | 2009-12-13 | 06 | 7.9530 | 0.0  | X | X | X | D-region       |
| 564 |            |    |        |      |   |   |   |                |
| 565 | 2010-03-02 | 12 | 5.4230 | 6.2  | U | U | - |                |
| 566 | 2010-03-02 | 13 | 5.4230 | 6.2  | U | U | - |                |
| 567 | 2010-03-02 | 14 | 5.4230 | 5.2  | U | U | U |                |
| 568 |            |    |        |      |   |   |   |                |
| 569 | 2010-03-12 | 10 | 5.4249 | 5.4  | U | U | - |                |
| 570 | 2010-03-12 | 12 | 5.4249 | 5.7  | U | U | - |                |
| 571 |            |    |        |      |   |   |   |                |
| 572 | 2010-03-14 | 09 | 5.4249 | 6.0  | U | U | - |                |
| 573 | 2010-03-14 | 10 | 5.4249 | 5.6  | U | U | - |                |
| 574 | 2010-03-14 | 11 | 5.4249 | 5.5  | U | U | - |                |
| 575 | 2010-03-14 | 12 | 5.4249 | 5.3  | U | U | - |                |
| 576 | 2010-03-14 | 13 | 5.4249 | 5.4  | U | U | - |                |
| 577 |            |    |        |      |   |   |   |                |
| 578 | 2010-06-01 | 08 | 7.9530 | 0.0  | X | X | X | Tune           |
| 579 | 2010-06-01 | 09 | 7.9530 | 0.0  | X | X | X | PMSE           |
| 580 | 2010-06-09 | 08 | 7.1000 | 6.8  | X | X | X | PMSE           |
| 581 | 2010-06-09 | 10 | 7.1000 | 10.6 | X | X | X |                |
| 582 | 2010-06-18 | 08 | 7.1000 | 8.9  | X | X | X | PMSE           |
| 583 | 2010-09-13 | 09 | 5.4230 | 5.9  | X | X | X | Test           |
| 584 |            |    |        |      |   |   |   |                |
| 585 | 2010-09-13 | 10 | 5.4230 | 5.9  | U | U | - | radar scanning |
| 586 | 2010-09-13 | 11 | 5.4230 | 6.0  | U | U | - |                |
| 587 | 2010-09-13 | 12 | 5.4230 | 6.0  | U | U | - |                |
| 588 |            |    |        |      |   |   |   |                |
| 589 | 2010-09-14 | 10 | 5.4230 | 7.9  | U | U | - | radar scanning |
| 590 | 2010-09-14 | 11 | 5.4230 | 7.1  | U | U | - |                |
| 591 | 2010-09-14 | 12 | 5.4230 | 6.2  | U | U | - |                |
| 592 |            |    |        |      |   |   |   |                |
| 593 | 2010-11-27 | 21 | 7.9530 | 0.0  | X | X | X | MARE           |

|     |            |    |        |     |   |   |   |                      |
|-----|------------|----|--------|-----|---|---|---|----------------------|
| 594 | 2010-11-28 | 19 | 7.9530 | 8.5 | X | X | X | MARE                 |
| 595 | 2010-11-28 | 23 | 7.9530 | 0.0 | X | X | X | MARE                 |
| 596 | 2010-12-06 | 22 | 7.9530 | 8.9 | X | X | X | MARE                 |
| 597 | 2010-12-06 | 23 | 7.9530 | 8.0 | X | X | X | MARE                 |
| 598 | 2010-12-07 | 17 | 7.9530 | 0.0 | X | X | X | MARE                 |
| 599 | 2010-12-07 | 19 | 7.9530 | 0.0 | X | X | X | MARE                 |
| 600 | 2010-12-16 | 10 | 3.9500 | 5.2 | X | X | X | Actually A2          |
| 601 | 2010-12-16 | 11 | 3.9500 | 5.5 | X | X | X |                      |
| 602 | 2010-12-16 | 12 | 3.9500 | 5.2 | X | X | X |                      |
| 603 |            |    |        |     |   |   |   |                      |
| 604 | 2011-03-07 | 12 | 6.1988 | 7.0 | Y | Y | - |                      |
| 605 | 2011-03-07 | 13 | 6.9588 | 6.8 | U | - | U |                      |
| 606 | 2011-03-07 | 14 | 6.9588 | 7.2 | U | U | - |                      |
| 607 |            |    |        |     |   |   |   |                      |
| 608 | 2011-05-07 | 10 | 6.2000 | 6.9 | U | U | - | radar scanning       |
| 609 | 2011-05-07 | 11 | 6.2000 | 6.6 | U | U | - |                      |
| 610 | 2011-05-07 | 12 | 6.2000 | 6.5 | U | U | - |                      |
| 611 |            |    |        |     |   |   |   |                      |
| 612 | 2011-05-09 | 10 | 6.2000 | 6.8 | U | U | - | radar scanning       |
| 613 | 2011-05-09 | 11 | 6.2000 | 6.0 | U | U | - |                      |
| 614 |            |    |        |     |   |   |   |                      |
| 615 | 2011-05-10 | 09 | 6.2000 | 6.9 | X | X | X | test                 |
| 616 | 2011-05-10 | 10 | 6.2000 | 7.5 | U | U | - |                      |
| 617 | 2011-05-10 | 11 | 6.2000 | 7.4 | U | U | - |                      |
| 618 | 2011-05-10 | 12 | 6.2000 | 6.3 | U | U | - |                      |
| 619 |            |    |        |     |   |   |   |                      |
| 620 | 2011-07-04 | 11 | 5.3000 | 5.8 | U | U | - | HF initially 6 S     |
| 621 | 2011-07-04 | 12 | 5.3000 | 6.0 | U | U | - |                      |
| 622 |            |    |        |     |   |   |   |                      |
| 623 | 2011-10-05 | 12 | 5.4230 | 7.3 | U | U | - | disturbed conditions |
| 624 | 2011-10-05 | 13 | 5.4230 | 0.0 | U | U | U |                      |
| 625 |            |    |        |     |   |   |   |                      |
| 626 | 2011-10-06 | 13 | 5.4230 | 7.0 | U | U | - |                      |
| 627 | 2011-10-06 | 14 | 5.4230 | 5.8 | U | U | - |                      |
| 628 |            |    |        |     |   |   |   |                      |
| 629 | 2011-10-07 | 13 | 6.1980 | 6.2 | U | U | - |                      |
| 630 | 2011-10-07 | 14 | 6.1980 | 6.5 | Y | Y | - |                      |
| 631 | 2011-10-07 | 15 | 6.7651 | 7.0 | Y | Y | - |                      |
| 632 | 2011-10-07 | 16 | 6.7700 | 6.4 | Y | - | Y |                      |
| 633 | 2011-10-07 | 17 | 6.2000 | 5.7 | Y | Y | - |                      |
| 634 |            |    |        |     |   |   |   |                      |
| 635 | 2011-10-08 | 13 | 7.1000 | 7.7 | Y | Y | - |                      |
| 636 | 2011-10-08 | 14 | 7.9530 | 7.2 | Y | - | Y |                      |
| 637 | 2011-10-08 | 15 | 6.2000 | 6.5 | Y | - | Y |                      |
| 638 | 2011-10-08 | 16 | 5.4230 | 5.0 | U | - | U |                      |
| 639 |            |    |        |     |   |   |   |                      |
| 640 | 2011-10-09 | 12 | 6.2000 | 6.2 | X | X | X | tune                 |
| 641 |            |    |        |     |   |   |   |                      |
| 642 | 2011-10-09 | 14 | 5.4230 | 5.6 | Y | Y | - | radar scanning       |
| 643 | 2011-10-09 | 15 | 5.4230 | 5.4 | Y | Y | U |                      |
| 644 |            |    |        |     |   |   |   |                      |
| 645 | 2011-10-10 | 13 | 6.2000 | nan | U | U | - | radar scanning       |
| 646 | 2011-10-10 | 14 | 6.2000 | nan | Y | U | Y |                      |
| 647 | 2011-10-10 | 15 | 7.1000 | nan | Y | - | Y |                      |
| 648 | 2011-10-10 | 16 | 6.2000 | nan | Y | - | Y |                      |
| 649 | 2011-10-10 | 17 | 5.4230 | nan | Y | - | Y |                      |
| 650 | 2011-10-10 | 18 | 5.4230 | nan | Y | - | Y |                      |
| 651 |            |    |        |     |   |   |   |                      |
| 652 | 2011-10-11 | 12 | 7.1000 | 7.5 | X | X | X | CW tune-up           |
| 653 |            |    |        |     |   |   |   |                      |
| 654 | 2011-10-11 | 13 | 7.1000 | 7.7 | Y | Y | Y |                      |
| 655 | 2011-10-11 | 14 | 7.9530 | 7.5 | Y | - | Y |                      |
| 656 | 2011-10-11 | 15 | 7.1000 | 7.2 | Y | - | Y |                      |
| 657 | 2011-10-11 | 16 | 5.4230 | 5.1 | U | - | U |                      |
| 658 |            |    |        |     |   |   |   |                      |
| 659 | 2011-10-12 | 13 | 7.1000 | 7.9 | Y | Y | - |                      |

|     |            |    |        |      |   |   |   |      |
|-----|------------|----|--------|------|---|---|---|------|
| 660 | 2011-10-12 | 14 | 7.9530 | 7.6  | Y | Y | Y |      |
| 661 | 2011-10-12 | 15 | 7.1000 | 8.2  | Y | - | Y |      |
| 662 | 2011-10-12 | 16 | 5.4230 | 6.6  | Y | - | Y |      |
| 663 |            |    |        |      |   |   |   |      |
| 664 | 2011-11-03 | 12 | 7.1001 | 7.3  | Y | Y | - |      |
| 665 | 2011-11-03 | 13 | 6.2001 | 7.2  | Y | Y | - |      |
| 666 | 2011-11-03 | 14 | 6.2001 | 6.1  | Y | Y | - |      |
| 667 | 2011-11-03 | 15 | 5.4251 | 6.1  | Y | Y | - |      |
| 668 |            |    |        |      |   |   |   |      |
| 669 | 2011-11-08 | 10 | 7.9530 | 9.8  | X | X | X | test |
| 670 | 2011-11-14 | 12 | 6.8800 | 11.5 | X | X | X | test |
| 671 | 2011-11-14 | 13 | 5.5200 | 10.3 | X | X | X | test |
| 672 |            |    |        |      |   |   |   |      |
| 673 | 2011-11-15 | 10 | 7.2730 | 11.7 | Y | Y | Y |      |
| 674 | 2011-11-15 | 11 | 7.2730 | 11.5 | Y | Y | Y |      |
| 675 | 2011-11-15 | 12 | 7.2730 | 11.4 | Y | Y | Y |      |
| 676 | 2011-11-15 | 13 | 7.2730 | 9.8  | Y | Y | Y |      |
| 677 |            |    |        |      |   |   |   |      |
| 678 | 2011-11-16 | 11 | 6.7000 | 10.3 | Y | Y | - |      |
| 679 | 2011-11-16 | 12 | 6.7000 | 10.3 | Y | Y | - |      |
| 680 | 2011-11-16 | 13 | 6.7000 | 8.6  | Y | Y | - |      |
| 681 |            |    |        |      |   |   |   |      |
| 682 | 2011-11-17 | 13 | 7.9530 | 8.6  | Y | Y | - |      |
| 683 | 2011-11-17 | 14 | 6.2000 | 7.8  | Y | Y | - |      |
| 684 | 2011-11-17 | 15 | 6.2000 | 6.3  | Y | Y | - |      |
| 685 |            |    |        |      |   |   |   |      |
| 686 | 2011-11-18 | 10 | 7.2730 | 10.3 | Q | Q | Q |      |
| 687 | 2011-11-18 | 11 | 7.2730 | 11.5 | Q | Q | Q |      |
| 688 | 2011-11-18 | 12 | 6.7000 | 9.1  | Y | Y | - |      |
| 689 | 2011-11-18 | 13 | 5.3095 | 8.5  | Y | Y | - |      |
| 690 | 2011-11-18 | 14 | 6.2000 | 6.9  | Y | Y | - |      |
| 691 | 2011-11-18 | 15 | 6.2000 | 5.7  | Y | Y | - |      |
| 692 |            |    |        |      |   |   |   |      |
| 693 | 2011-11-19 | 12 | 6.0500 | 8.5  | Y | Y | - |      |
| 694 | 2011-11-19 | 13 | 6.0500 | 8.7  | Y | Y | - |      |
| 695 | 2011-11-19 | 14 | 6.2000 | 6.5  | Y | Y | - |      |
| 696 |            |    |        |      |   |   |   |      |
| 697 | 2011-11-20 | 11 | 7.5200 | 9.0  | X | X | X | tune |
| 698 |            |    |        |      |   |   |   |      |
| 699 | 2011-11-20 | 12 | 7.3700 | 8.6  | Y | Y | - |      |
| 700 | 2011-11-20 | 13 | 6.0500 | 7.8  | Y | Y | - |      |
| 701 | 2011-11-20 | 14 | 6.2000 | 6.5  | Y | Y | - |      |
| 702 | 2011-11-20 | 15 | 5.5200 | 6.0  | Y | Y | - |      |
| 703 |            |    |        |      |   |   |   |      |
| 704 | 2011-11-22 | 11 | 6.7000 | 10.9 | Y | Y | - |      |
| 705 | 2011-11-22 | 12 | 6.0500 | 10.5 | Y | Y | - |      |
| 706 | 2011-11-22 | 13 | 6.7700 | 7.5  | U | U | - |      |
| 707 |            |    |        |      |   |   |   |      |
| 708 | 2011-11-23 | 12 | 6.7000 | 9.0  | Y | Y | - |      |
| 709 | 2011-11-23 | 13 | 6.7000 | 8.4  | Y | Y | - |      |
| 710 | 2011-11-23 | 14 | 5.4230 | 6.5  | Y | Y | - |      |
| 711 | 2011-11-23 | 15 | 3.9500 | 4.4  | Y | Y | - |      |
| 712 |            |    |        |      |   |   |   |      |
| 713 | 2011-11-24 | 10 | 5.3095 | 8.7  | Y | Y | - |      |
| 714 | 2011-11-24 | 11 | 6.7000 | 8.6  | Y | Y | - |      |
| 715 | 2011-11-24 | 12 | 6.2000 | 8.3  | Y | Y | Y |      |
| 716 | 2011-11-24 | 13 | 5.5200 | 5.1  | U | U | U |      |
| 717 |            |    |        |      |   |   |   |      |
| 718 | 2011-11-25 | 09 | 6.7700 | 6.7  | X | X | X | tune |
| 719 |            |    |        |      |   |   |   |      |
| 720 | 2011-11-25 | 10 | 5.4230 | 7.9  | U | U | - |      |
| 721 | 2011-11-25 | 11 | 7.1000 | 9.1  | U | U | - |      |
| 722 | 2011-11-25 | 12 | 6.7000 | 7.8  | Y | Y | - |      |
| 723 | 2011-11-25 | 13 | 5.3095 | 6.4  | Y | Y | - |      |
| 724 |            |    |        |      |   |   |   |      |
| 725 | 2011-11-26 | 11 | 7.5200 | 7.9  | X | X | X | tune |

726  
727 2011-11-26 12 6.7000 7.6 Y Y -  
728 2011-11-26 13 5.3095 7.3 Y Y -  
729 2011-11-26 14 6.2000 5.8 Y Y -  
730  
731 2011-11-27 12 6.7000 0.0 Y Y -  
732 2011-11-27 13 5.3095 0.0 Y Y -  
733 2011-11-27 14 6.2000 0.0 U U -  
734  
735 2011-12-07 09 5.4230 7.1 X X X API  
736 2011-12-07 10 5.4230 7.5 X X X  
737 2011-12-07 11 5.4230 7.3 X X X  
738 2011-12-07 12 5.4230 7.2 X X X  
739 2011-12-07 13 5.4230 6.9 X X X  
740 2011-12-07 14 5.4230 4.7 X X X  
741 2011-12-08 08 5.4230 5.0 X X X API  
742 2011-12-08 09 5.4230 6.4 X X X  
743 2011-12-08 10 5.4230 7.7 X X X  
744 2011-12-09 08 5.4230 5.0 X X X API  
745 2011-12-09 09 5.4230 6.3 X X X  
746 2011-12-09 10 5.4230 7.3 X X X  
747 2011-12-09 11 5.4230 7.2 X X X  
748 2011-12-09 12 5.4230 6.4 X X X  
749 2011-12-09 13 5.4230 5.1 X X X  
750 2011-12-11 13 5.4230 5.8 X X X  
751 2011-12-11 14 5.4230 4.8 X X X  
752 2011-12-12 08 5.4230 5.4 X X X API  
753 2011-12-12 09 5.4230 6.1 X X X  
754 2011-12-12 10 5.4230 7.1 X X X  
755 2011-12-12 11 5.4230 7.9 X X X  
756 2011-12-12 12 5.4230 7.1 X X X  
757 2011-12-12 13 5.4230 6.4 X X X  
758 2011-12-13 09 5.4230 6.1 X X X  
759 2011-12-13 10 5.4230 6.9 X X X  
760 2011-12-13 11 5.4230 7.1 X X X  
761 2011-12-13 12 5.4230 7.3 X X X  
762 2011-12-13 13 5.4230 6.4 X X X  
763 2011-12-13 14 5.4230 5.1 X X X  
764 2011-12-14 09 5.3600 5.8 X X X API  
765 2011-12-14 10 5.3600 6.7 X X X  
766 2011-12-14 11 5.3600 6.9 X X X  
767 2011-12-14 12 5.3600 6.2 X X X  
768 2011-12-14 13 5.3600 6.1 X X X  
769 2011-12-15 09 5.3600 6.3 X X X API  
770 2011-12-15 10 5.3600 7.3 X X X  
771 2011-12-15 11 5.3600 7.1 X X X  
772 2011-12-15 12 5.3600 6.3 X X X  
773 2011-12-15 13 5.3600 6.1 X X X  
774 2012-01-25 09 5.4230 NaN X X X PMWE  
775 2012-01-25 10 5.4230 NaN X X X  
776 2012-01-25 11 5.4230 NaN X X X  
777 2012-01-25 12 5.4230 NaN X X X  
778 2012-01-25 13 7.9530 NaN X X X  
779 2012-01-25 14 7.9530 NaN X X X  
780 2012-01-26 10 7.9530 NaN X X X PMWE  
781 2012-01-26 11 7.1000 NaN X X X  
782 2012-01-26 12 7.1000 NaN X X X  
783 2012-01-26 13 7.1000 NaN X X X  
784 2012-01-30 11 5.4230 NaN X X X PMWE  
785 2012-01-30 12 5.4230 NaN X X X  
786 2012-01-30 13 5.4230 NaN X X X  
787  
788 2012-02-12 13 6.2000 7.1 U U - radar scanning  
789 2012-02-12 14 6.2000 6.2 U U -  
790  
791 2012-02-13 11 7.1000 8.2 Y Y -





924 2012-10-12 12 6.2000 6.7 U - U  
925 2012-10-12 13 5.4230 5.8 U U U  
926  
927 2012-10-13 14 4.0400 4.1 X X X array 2!  
928 2012-10-13 15 4.0400 4.8 X X X  
929 2012-10-13 16 4.0400 5.1 X X X  
930 2012-10-13 17 4.0400 5.3 X X X  
931 2012-10-14 10 6.2000 7.5 X X X tune/cal  
932 2012-10-14 11 6.9600 7.2 X X X  
933 2012-10-14 12 6.2000 6.6 X X X  
934  
935 2012-10-14 14 6.2000 5.9 U - U  
936 2012-10-14 15 6.2000 5.8 U - U  
937  
938 2012-10-15 08 5.4230 6.0 X X X tune  
939  
940 2012-10-15 12 6.7700 7.1 U - U scanning  
941 2012-10-15 13 6.2000 6.0 U U U  
942 2012-10-15 14 5.4230 6.0 U - U  
943 2012-10-15 15 5.4230 5.8 U - U  
944 2012-10-15 16 5.4230 5.4 Y - Y  
945  
946 2012-10-16 10 6.9600 8.9 X X X cal  
947 2012-10-16 11 7.1000 9.2 Q Q Q  
948 2012-10-16 12 7.1000 8.9 Q Q Q  
949  
950 2012-10-16 13 7.1000 8.4 Y Y -  
951 2012-10-16 14 6.9600 7.2 Y Y -  
952 2012-10-16 15 5.4230 7.1 U U -  
953  
954 2012-10-17 08 6.7700 7.1 X X X test  
955 2012-10-17 09 6.7700 8.1 X X X  
956 2012-10-17 11 7.9530 8.3 X X X test  
957  
958 2012-10-17 12 7.1000 8.0 Q Q Q  
959 2012-10-17 13 7.1000 8.0 Q Q Q  
960 2012-10-17 14 7.1000 7.8 Q Q Q  
961 2012-10-17 15 7.1000 6.8 Q Q Q  
962 2012-10-17 16 5.4230 6.7 Q Q Q  
963  
964 2012-10-18 11 6.7700 10.5 U U -  
965 2012-10-18 12 7.9530 10.3 Y - Y radar scanning  
966 2012-10-18 13 7.9530 9.4 Y U Y  
967 2012-10-18 14 7.9530 9.3 Y U Y  
968 2012-10-18 15 7.9530 7.9 Y - Y  
969 2012-10-18 16 5.4230 6.5 U U -  
970  
971 2012-10-19 11 7.9530 10.3 Y - Y radar scanning  
972 2012-10-19 12 7.9530 10.3 Y U Y  
973 2012-10-19 13 7.9530 9.3 Y Y -  
974 2012-10-19 14 7.9530 8.8 U U -  
975 2012-10-19 15 7.1000 7.9 Y Y -  
976 2012-10-19 16 7.1000 7.3 Y Y -  
977 2012-10-19 17 6.2000 6.5 Y - Y  
978 2012-10-19 18 5.4230 5.8 U U U  
979  
980 2012-10-20 13 7.9530 9.3 Y U Y  
981 2012-10-20 14 7.9530 9.2 Y U Y  
982 2012-10-20 15 7.9530 7.9 Y Y Y  
983 2012-10-20 16 7.1000 7.8 Y - Y  
984 2012-10-20 17 6.2000 7.0 Y - Y  
985 2012-10-20 18 6.2000 6.6 Y - Y  
986  
987 2012-10-21 13 7.9530 9.3 Y U Y radar scanning  
988 2012-10-21 14 7.9530 9.1 Y U Y radar scanning  
989 2012-10-21 15 7.9530 9.0 Y U Y radar scanning



|      |            |    |        |      |   |   |   |                                  |
|------|------------|----|--------|------|---|---|---|----------------------------------|
| 990  | 2012-10-21 | 16 | 7.1000 | 7.9  | Y | Y | Y |                                  |
| 991  | 2012-10-21 | 17 | 7.1000 | 6.5  | Y | - | Y |                                  |
| 992  |            |    |        |      |   |   |   |                                  |
| 993  | 2012-10-22 | 12 | 5.4230 | 10.6 | X | X | X | tune                             |
| 994  | 2012-10-22 | 13 | 7.9530 | 10.1 | Y | U | Y | radar scanning                   |
| 995  | 2012-10-22 | 14 | 7.9530 | 9.3  | Y | U | Y | radar scanning                   |
| 996  | 2012-10-22 | 15 | 7.9530 | 9.2  | Y | U | Y |                                  |
| 997  | 2012-10-22 | 16 | 7.1000 | 8.2  | Y | Y | Y |                                  |
| 998  | 2012-10-22 | 17 | 7.1000 | 7.0  | Y | Y | Y |                                  |
| 999  |            |    |        |      |   |   |   |                                  |
| 1000 | 2012-10-24 | 09 | 5.4230 | 9.6  | X | X | X | test                             |
| 1001 |            |    |        |      |   |   |   |                                  |
| 1002 | 2012-11-23 | 09 | 5.4091 | 7.7  | U | U | - |                                  |
| 1003 | 2012-11-23 | 10 | 6.1861 | 8.5  | Y | Y | - |                                  |
| 1004 |            |    |        |      |   |   |   |                                  |
| 1005 | 2012-11-24 | 08 | 5.4091 | 0.0  | U | U | - | disturbed conditions             |
| 1006 | 2012-11-24 | 09 | 5.4091 | 5.8  | U | U | - |                                  |
| 1007 | 2012-11-24 | 10 | 5.4091 | 7.2  | U | U | - |                                  |
| 1008 | 2012-11-24 | 11 | 6.1861 | 6.9  | U | U | - |                                  |
| 1009 |            |    |        |      |   |   |   |                                  |
| 1010 | 2012-12-03 | 10 | 5.6020 | 5.8  | X | X | X | not in handwritten log           |
| 1011 | 2012-12-03 | 11 | 5.6020 | 5.9  | Y | - | Y | large data gap                   |
| 1012 | 2012-12-03 | 12 | 5.6020 | 5.7  | Y | - | Y |                                  |
| 1013 | 2012-12-03 | 13 | 5.6020 | 5.1  | Y | - | Y |                                  |
| 1014 |            |    |        |      |   |   |   |                                  |
| 1015 | 2012-12-04 | 11 | 5.6020 | 5.7  | Y | - | Y |                                  |
| 1016 | 2012-12-04 | 12 | 5.6020 | 5.5  | Y | Y | Y |                                  |
| 1017 | 2012-12-04 | 13 | 5.6020 | 5.0  | Y | Y | U |                                  |
| 1018 |            |    |        |      |   |   |   |                                  |
| 1019 | 2012-12-05 | 11 | 5.4230 | 5.2  | X | X | X |                                  |
| 1020 |            |    |        |      |   |   |   |                                  |
| 1021 | 2012-12-06 | 10 | 5.6020 | 5.6  | Y | - | Y |                                  |
| 1022 | 2012-12-06 | 11 | 5.6020 | 5.5  | Y | Y | Y |                                  |
| 1023 | 2012-12-06 | 12 | 5.6003 | 5.3  | Y | Y | - |                                  |
| 1024 |            |    |        |      |   |   |   |                                  |
| 1025 | 2012-12-07 | 10 | 5.4230 | 5.7  | X | X | X |                                  |
| 1026 | 2012-12-07 | 11 | 5.4230 | 5.5  | X | X | X |                                  |
| 1027 | 2012-12-07 | 12 | 5.4230 | 5.0  | X | X | X |                                  |
| 1028 | 2012-12-07 | 13 | 5.6056 | 4.9  | U | - | U |                                  |
| 1029 |            |    |        |      |   |   |   |                                  |
| 1030 | 2013-02-16 | 12 | 6.2000 | 6.7  | Y | U | Y |                                  |
| 1031 | 2013-02-16 | 13 | 5.3000 | 6.6  | Y | U | Y |                                  |
| 1032 | 2013-02-16 | 14 | 5.3000 | 5.7  | Y | Y | Y |                                  |
| 1033 | 2013-02-16 | 15 | 5.3000 | 5.2  | Y | - | Y |                                  |
| 1034 |            |    |        |      |   |   |   |                                  |
| 1035 | 2013-02-17 | 12 | 5.3000 | 5.6  | U | U | U |                                  |
| 1036 | 2013-02-17 | 13 | 5.3000 | 5.0  | U | U | U |                                  |
| 1037 |            |    |        |      |   |   |   |                                  |
| 1038 | 2013-02-18 | 12 | 5.3000 | 5.3  | U | U | - |                                  |
| 1039 | 2013-02-18 | 13 | 5.3000 | 5.5  | U | U | U |                                  |
| 1040 | 2013-02-18 | 14 | 5.3000 | 5.4  | U | U | U | but Y after 15:30 UT, A2, X-mode |
| 1041 |            |    |        |      |   |   |   |                                  |
| 1042 | 2013-02-19 | 12 | 6.2000 | 6.9  | U | U | U | radar scanning                   |
| 1043 | 2013-02-19 | 13 | 6.2000 | 6.7  | U | U | U |                                  |
| 1044 | 2013-02-19 | 14 | 5.4230 | 5.8  | U | U | U | disturbed conditions             |
| 1045 |            |    |        |      |   |   |   |                                  |
| 1046 | 2013-02-20 | 12 | 5.3500 | 7.2  | U | U | - |                                  |
| 1047 | 2013-02-20 | 13 | 5.3500 | 7.3  | U | U | - | disturbed conditions             |
| 1048 | 2013-02-20 | 14 | 5.4230 | 5.8  | U | U | U | X-mode was A2                    |
| 1049 |            |    |        |      |   |   |   |                                  |
| 1050 | 2013-02-21 | 12 | 7.1000 | 7.8  | Y | Y | Y |                                  |
| 1051 | 2013-02-21 | 13 | 7.1000 | 7.3  | Y | Y | Y |                                  |
| 1052 | 2013-02-21 | 14 | 5.4230 | 6.8  | Y | Y | Y |                                  |
| 1053 | 2013-02-21 | 15 | 5.4230 | 5.9  | Y | U | Y |                                  |
| 1054 |            |    |        |      |   |   |   |                                  |
| 1055 | 2013-02-23 | 08 | 5.4230 | 5.8  | U | U | - |                                  |

|      |            |    |        |     |   |   |   |      |
|------|------------|----|--------|-----|---|---|---|------|
| 1056 | 2013-02-23 | 09 | 6.2000 | 7.0 | U | U | - |      |
| 1057 | 2013-02-23 | 10 | 6.2000 | 6.6 | U | U | U |      |
| 1058 | 2013-02-23 | 11 | 6.2000 | 7.3 | Y | U | Y |      |
| 1059 | 2013-02-23 | 12 | 6.2000 | 7.3 | Y | Y | Y |      |
| 1060 | 2013-02-23 | 13 | 5.4230 | 6.6 | Y | Y | - |      |
| 1061 | 2013-02-23 | 14 | 6.2000 | 6.9 | Y | Y | Y |      |
| 1062 | 2013-02-23 | 15 | 5.4230 | 5.7 | Y | - | Y |      |
| 1063 |            |    |        |     |   |   |   |      |
| 1064 | 2013-02-24 | 11 | 5.4230 | 5.9 | U | U | U |      |
| 1065 | 2013-02-24 | 12 | 5.4230 | 6.2 | U | U | - |      |
| 1066 | 2013-02-24 | 13 | 5.4230 | 6.5 | U | U | U |      |
| 1067 | 2013-02-24 | 14 | 5.4230 | 5.9 | U | U | U |      |
| 1068 |            |    |        |     |   |   |   |      |
| 1069 | 2013-02-25 | 08 | 5.4230 | 6.5 | U | U | U |      |
| 1070 | 2013-02-25 | 09 | 5.4230 | 6.8 | Y | U | Y |      |
| 1071 | 2013-02-25 | 10 | 6.2000 | 7.3 | Y | - | Y |      |
| 1072 | 2013-02-25 | 11 | 6.7700 | 7.0 | Y | Y | Y |      |
| 1073 | 2013-02-25 | 12 | 6.7700 | 7.2 | Y | U | Y |      |
| 1074 | 2013-02-25 | 13 | 6.7000 | 7.1 | Y | Y | Y |      |
| 1075 | 2013-02-25 | 14 | 5.4230 | 6.3 | Y | Y | Y |      |
| 1076 | 2013-02-25 | 15 | 5.4230 | 6.0 | Y | Y | Y |      |
| 1077 | 2013-02-25 | 16 | 5.4230 | 5.7 | Y | U | Y |      |
| 1078 | 2013-02-25 | 17 | 5.4230 | 5.7 | Y | - | Y |      |
| 1079 |            |    |        |     |   |   |   |      |
| 1080 | 2013-02-26 | 08 | 5.4230 | 6.6 | U | U | - |      |
| 1081 | 2013-02-26 | 09 | 6.2000 | 7.5 | Y | Y | - |      |
| 1082 | 2013-02-26 | 10 | 6.2000 | 7.5 | Y | Y | Y |      |
| 1083 | 2013-02-26 | 11 | 7.1000 | 8.1 | Y | Y | Y |      |
| 1084 | 2013-02-26 | 12 | 7.1000 | 7.7 | Y | Y | Y |      |
| 1085 | 2013-02-26 | 13 | 7.1000 | 7.9 | Y | Y | Y |      |
| 1086 | 2013-02-26 | 14 | 5.4230 | 7.1 | Y | Y | Y |      |
| 1087 | 2013-02-26 | 15 | 5.4230 | 5.8 | U | U | U |      |
| 1088 |            |    |        |     |   |   |   |      |
| 1089 | 2013-03-05 | 12 | 6.8000 | 7.9 | Y | Y | - |      |
| 1090 | 2013-03-05 | 13 | 6.8800 | 7.8 | Y | Y | - |      |
| 1091 | 2013-03-05 | 14 | 6.8800 | 7.9 | Y | Y | - |      |
| 1092 | 2013-03-05 | 15 | 5.5500 | 7.2 | Y | Y | - |      |
| 1093 | 2013-03-05 | 16 | 5.5500 | 6.7 | U | U | - |      |
| 1094 |            |    |        |     |   |   |   |      |
| 1095 | 2013-03-06 | 12 | 7.9530 | 9.2 | U | U | - |      |
| 1096 | 2013-03-06 | 13 | 7.9530 | 8.1 | Y | Y | - |      |
| 1097 | 2013-03-06 | 14 | 6.9600 | 7.7 | Y | Y | - |      |
| 1098 | 2013-03-06 | 15 | 5.5600 | 6.9 | Y | Y | - |      |
| 1099 | 2013-03-06 | 16 | 5.5600 | 6.0 | U | U | - |      |
| 1100 |            |    |        |     |   |   |   |      |
| 1101 | 2013-03-19 | 12 | 7.9530 | 7.9 | X | X | X | tune |
| 1102 |            |    |        |     |   |   |   |      |
| 1103 | 2013-03-20 | 09 | 7.9530 | 7.9 | X | X | X | PMWE |
| 1104 | 2013-03-20 | 10 | 7.9530 | 7.5 | X | X | X |      |
| 1105 | 2013-03-20 | 11 | 7.9530 | 8.1 | X | X | X |      |
| 1106 | 2013-03-20 | 12 | 7.9530 | 7.9 | X | X | X |      |
| 1107 | 2013-03-21 | 09 | 7.9530 | 0.0 | X | X | X |      |
| 1108 | 2013-03-21 | 10 | 7.9530 | 0.0 | X | X | X |      |
| 1109 |            |    |        |     |   |   |   |      |
| 1110 | 2013-05-15 | 08 | 6.7700 | 6.4 | X | X | X | test |
| 1111 | 2013-05-15 | 09 | 6.7700 | 6.6 | X | X | X |      |
| 1112 | 2013-05-21 | 16 | 6.7700 | 6.7 | X | X | X | test |
| 1113 | 2013-05-21 | 17 | 6.7700 | 6.9 | X | X | X |      |
| 1114 | 2013-05-22 | 07 | 6.7700 | 7.7 | X | X | X | PMSE |
| 1115 | 2013-05-22 | 08 | 6.7700 | 7.6 | X | X | X |      |
| 1116 | 2013-05-22 | 09 | 6.7700 | 7.9 | X | X | X |      |
| 1117 | 2013-05-22 | 10 | 6.7700 | 7.8 | X | X | X |      |
| 1118 | 2013-05-22 | 11 | 6.7700 | 7.7 | X | X | X |      |
| 1119 | 2013-05-22 | 12 | 6.7700 | 7.8 | X | X | X |      |
| 1120 | 2013-05-23 | 07 | 6.7700 | 0.0 | X | X | X |      |
| 1121 | 2013-05-23 | 08 | 6.7700 | 0.0 | X | X | X |      |

|      |            |    |        |      |   |   |   |                      |
|------|------------|----|--------|------|---|---|---|----------------------|
| 1122 | 2013-05-23 | 09 | 6.7700 | 0.0  | X | X | X |                      |
| 1123 | 2013-05-23 | 10 | 6.7700 | 0.0  | X | X | X |                      |
| 1124 | 2013-05-23 | 12 | 6.7700 | 0.0  | X | X | X |                      |
| 1125 |            |    |        |      |   |   |   |                      |
| 1126 | 2013-06-14 | 15 | 6.7700 | 6.2  | X | X | X | test                 |
| 1127 | 2013-06-14 | 16 | 6.7700 | 6.3  | X | X | X |                      |
| 1128 | 2013-06-17 | 09 | 6.7700 | 7.6  | X | X | X | PMSE                 |
| 1129 | 2013-06-17 | 10 | 6.7700 | 7.1  | X | X | X |                      |
| 1130 | 2013-06-17 | 11 | 6.7700 | 6.7  | X | X | X |                      |
| 1131 | 2013-06-17 | 12 | 6.7700 | 6.5  | X | X | X |                      |
| 1132 | 2013-06-18 | 09 | 6.7700 | 7.1  | X | X | X | PMSE                 |
| 1133 | 2013-06-18 | 10 | 6.7700 | 7.0  | X | X | X |                      |
| 1134 | 2013-06-18 | 11 | 6.7700 | 6.6  | X | X | X |                      |
| 1135 | 2013-06-20 | 09 | 6.7700 | 6.1  | X | X | X | PMSE                 |
| 1136 | 2013-06-22 | 09 | 6.7700 | 6.0  | X | X | X | PMSE                 |
| 1137 | 2013-06-22 | 10 | 6.7700 | 6.0  | X | X | X |                      |
| 1138 | 2013-06-23 | 12 | 6.7700 | 6.1  | X | X | X | PMSE                 |
| 1139 |            |    |        |      |   |   |   |                      |
| 1140 | 2013-07-24 | 09 | 6.7700 | 6.1  | X | X | X | PMSE                 |
| 1141 | 2013-07-24 | 11 | 6.7700 | 6.1  | X | X | X |                      |
| 1142 | 2013-07-25 | 10 | 6.7700 | 6.5  | X | X | X | PMSE                 |
| 1143 | 2013-07-25 | 11 | 6.7700 | 6.0  | X | X | X |                      |
| 1144 | 2013-07-25 | 13 | 6.7700 | 6.2  | X | X | X |                      |
| 1145 | 2013-07-27 | 12 | 6.7700 | 6.1  | X | X | X | PMSE                 |
| 1146 | 2013-07-29 | 09 | 6.7700 | 6.5  | X | X | X | PMSE                 |
| 1147 | 2013-07-29 | 10 | 6.7700 | 6.6  | X | X | X |                      |
| 1148 | 2013-07-29 | 11 | 6.7700 | 6.2  | X | X | X |                      |
| 1149 | 2013-07-29 | 12 | 6.7700 | 6.1  | X | X | X |                      |
| 1150 | 2013-07-29 | 13 | 6.7700 | 6.1  | X | X | X |                      |
| 1151 |            |    |        |      |   |   |   |                      |
| 1152 | 2013-10-18 | 12 | 6.2000 | 9.3  | Y | U | Y |                      |
| 1153 | 2013-10-18 | 13 | 6.2000 | 9.1  | Y | U | Y |                      |
| 1154 |            |    |        |      |   |   |   |                      |
| 1155 | 2013-10-19 | 12 | 6.2000 | 9.2  | Y | U | Y |                      |
| 1156 | 2013-10-19 | 13 | 6.2000 | 9.3  | Y | U | Y | also A3              |
| 1157 | 2013-10-19 | 14 | 6.2000 | 9.1  | Y | U | Y | also A3              |
| 1158 | 2013-10-19 | 15 | 6.2000 | 8.2  | Y | Y | Y | also A3              |
| 1159 |            |    |        |      |   |   |   |                      |
| 1160 | 2013-10-20 | 12 | 6.2000 | 9.2  | Y | U | Y | also A3              |
| 1161 | 2013-10-20 | 13 | 6.2000 | 9.2  | Y | U | Y | also A3              |
| 1162 | 2013-10-20 | 14 | 6.2000 | 9.2  | Y | U | Y | also A3              |
| 1163 | 2013-10-20 | 15 | 6.2000 | 7.7  | Y | Y | Y | also A3              |
| 1164 | 2013-10-20 | 16 | 6.2000 | 6.4  | Y | Y | Y |                      |
| 1165 |            |    |        |      |   |   |   |                      |
| 1166 | 2013-10-21 | 10 | 7.1000 | 9.5  | X | X | X | tune                 |
| 1167 | 2013-10-21 | 12 | 7.9530 | 9.4  | Q | Q | Q |                      |
| 1168 | 2013-10-21 | 13 | 7.9530 | 9.3  | Q | Q | Q |                      |
| 1169 | 2013-10-21 | 14 | 7.9530 | 9.2  | Q | Q | Q |                      |
| 1170 | 2013-10-21 | 15 | 7.1000 | 8.5  | Q | Q | Q |                      |
| 1171 |            |    |        |      |   |   |   |                      |
| 1172 | 2013-10-22 | 12 | 7.9500 | 10.1 | Y | Y | Y |                      |
| 1173 | 2013-10-22 | 13 | 7.9500 | 10.3 | Y | Y | Y |                      |
| 1174 | 2013-10-22 | 14 | 6.6000 | 9.2  | Y | Y | - |                      |
| 1175 | 2013-10-22 | 15 | 6.7000 | 8.5  | Y | Y | Y |                      |
| 1176 | 2013-10-22 | 16 | 7.1000 | 8.2  | Y | - | Y |                      |
| 1177 | 2013-10-22 | 17 | 7.1000 | 7.0  | Y | - | Y |                      |
| 1178 |            |    |        |      |   |   |   |                      |
| 1179 | 2013-10-23 | 12 | 6.7000 | 9.2  | U | U | - | disturbed conditions |
| 1180 | 2013-10-23 | 13 | 6.7000 | 9.3  | U | U | - |                      |
| 1181 | 2013-10-23 | 14 | 5.4230 | 9.0  | U | U | U |                      |
| 1182 | 2013-10-23 | 15 | 5.4230 | 7.9  | Y | U | Y |                      |
| 1183 | 2013-10-23 | 16 | 6.2000 | 6.6  | Q | Q | Q |                      |
| 1184 | 2013-10-23 | 17 | 6.2000 | 6.2  | Q | Q | Q |                      |
| 1185 |            |    |        |      |   |   |   |                      |
| 1186 | 2013-10-24 | 12 | 5.4230 | 9.5  | Q | Q | Q |                      |
| 1187 | 2013-10-24 | 14 | 5.4230 | 9.3  | Y | U | Y | also A3              |



|      |            |    |        |     |   |   |   |             |
|------|------------|----|--------|-----|---|---|---|-------------|
| 1254 | 2013-11-25 | 08 | 5.4230 | 5.8 | X | X | X | D-region    |
| 1255 | 2013-11-25 | 09 | 5.4230 | 6.9 | X | X | X |             |
| 1256 | 2013-11-25 | 10 | 7.9530 | 7.2 | X | X | X |             |
| 1257 | 2013-11-25 | 11 | 7.9530 | 7.3 | X | X | X |             |
| 1258 |            |    |        |     |   |   |   |             |
| 1259 | 2013-11-26 | 10 | 7.9530 | 7.3 | X | X | X |             |
| 1260 | 2013-11-26 | 11 | 7.9530 | 7.3 | X | X | X |             |
| 1261 |            |    |        |     |   |   |   |             |
| 1262 | 2013-12-10 | 10 | 6.2000 | 7.8 | X | X | X | tune        |
| 1263 | 2013-12-11 | 10 | 6.9600 | 7.9 | X | X | X | tune        |
| 1264 | 2013-12-11 | 11 | 6.9600 | 7.8 | X | X | X | rapid cycle |
| 1265 |            |    |        |     |   |   |   |             |
| 1266 | 2014-02-26 | 15 | 7.9530 | 9.7 | X | X | X | tune        |
| 1267 | 2014-06-26 | 08 | 6.7700 | 7.4 | X | X | X | PMSE        |
| 1268 | 2014-06-26 | 11 | 6.7700 | 6.6 | X | X | X |             |
| 1269 | 2014-06-26 | 12 | 6.7700 | 6.4 | X | X | X |             |
| 1270 | 2014-06-27 | 09 | 6.7700 | 6.1 | X | X | X | PMSE        |
| 1271 | 2014-06-27 | 10 | 6.7700 | 6.1 | X | X | X |             |
| 1272 | 2014-06-27 | 13 | 5.3000 | 5.8 | X | X | X |             |
| 1273 | 2014-06-30 | 08 | 6.7700 | 6.3 | X | X | X | PMSE        |
| 1274 | 2014-06-30 | 09 | 6.7700 | 6.2 | X | X | X |             |
| 1275 | 2014-06-30 | 10 | 6.7700 | 6.3 | X | X | X |             |
| 1276 | 2014-06-30 | 11 | 6.7700 | 6.3 | X | X | X |             |
| 1277 | 2014-06-30 | 12 | 6.7700 | 6.1 | X | X | X |             |
| 1278 | 2014-07-01 | 08 | 6.7700 | 6.8 | X | X | X | PMSE        |
| 1279 | 2014-07-01 | 09 | 6.7700 | 6.6 | X | X | X |             |
| 1280 | 2014-07-01 | 10 | 6.7700 | 7.3 | X | X | X |             |
| 1281 | 2014-07-01 | 11 | 6.7700 | 6.4 | X | X | X |             |
| 1282 | 2014-07-01 | 12 | 6.7700 | 6.5 | X | X | X |             |
| 1283 | 2014-07-02 | 09 | 6.7700 | 7.8 | X | X | X | PMSE        |
| 1284 | 2014-07-02 | 10 | 6.7700 | 7.0 | X | X | X |             |
| 1285 | 2014-07-02 | 11 | 6.7700 | 6.6 | X | X | X |             |
| 1286 | 2014-07-02 | 12 | 6.7700 | 6.8 | X | X | X |             |
| 1287 | 2014-07-03 | 11 | 6.7700 | 6.4 | X | X | X | PMSE        |
| 1288 | 2014-07-03 | 12 | 6.7700 | 6.8 | X | X | X |             |
| 1289 | 2014-07-04 | 09 | 6.7700 | 6.6 | X | X | X | PMSE        |
| 1290 | 2014-07-04 | 10 | 6.7700 | 7.2 | X | X | X |             |
| 1291 | 2014-07-04 | 11 | 6.7700 | 7.4 | X | X | X |             |
| 1292 | 2014-07-04 | 12 | 6.7700 | 6.7 | X | X | X |             |
| 1293 | 2014-07-04 | 13 | 6.7700 | 6.4 | X | X | X |             |
| 1294 | 2014-07-06 | 15 | 5.4230 | 6.5 | X | X | X | tune        |
| 1295 | 2014-07-07 | 08 | 5.4230 | 7.4 | X | X | X | tune        |
| 1296 | 2014-07-07 | 09 | 5.4230 | 7.0 | Q | Q | Q |             |
| 1297 | 2014-07-07 | 10 | 5.4230 | 6.9 | Q | Q | Q |             |
| 1298 | 2014-07-07 | 11 | 5.4230 | 6.7 | Q | Q | Q |             |
| 1299 | 2014-07-08 | 07 | 7.9530 | 7.2 | X | X | X | ?           |
| 1300 | 2014-07-08 | 08 | 6.7700 | 7.5 | X | X | X | PMSE        |
| 1301 | 2014-07-08 | 09 | 6.7700 | 7.5 | X | X | X |             |
| 1302 | 2014-07-08 | 10 | 6.7700 | 7.0 | X | X | X |             |
| 1303 | 2014-07-08 | 11 | 6.2000 | 6.7 | Q | Q | Q |             |
| 1304 | 2014-07-08 | 12 | 6.2000 | 6.7 | Q | Q | Q |             |
| 1305 | 2014-07-09 | 08 | 5.3000 | 7.4 | X | X | X | PMSE        |
| 1306 | 2014-07-09 | 09 | 6.7700 | 7.0 | X | X | X |             |
| 1307 | 2014-07-09 | 10 | 6.7700 | 6.8 | X | X | X |             |
| 1308 | 2014-07-09 | 11 | 6.7700 | 6.6 | X | X | X |             |
| 1309 | 2014-07-09 | 12 | 5.4230 | 6.7 | X | X | X |             |
| 1310 | 2014-07-11 | 07 | 6.7700 | 6.3 | X | X | X | PMSE        |
| 1311 | 2014-07-11 | 08 | 6.7700 | 6.3 | X | X | X |             |
| 1312 | 2014-07-11 | 09 | 6.7700 | 6.5 | X | X | X |             |
| 1313 | 2014-07-11 | 10 | 6.7700 | 7.0 | X | X | X |             |
| 1314 |            |    |        |     |   |   |   |             |
| 1315 | 2014-10-14 | 10 | 6.2000 | 7.2 | X | X | X | tune        |
| 1316 | 2014-10-15 | 09 | 5.3000 | 7.0 | X | X | X | tune        |
| 1317 |            |    |        |     |   |   |   |             |
| 1318 | 2014-10-15 | 10 | 6.2000 | 7.4 | U | U | U |             |
| 1319 | 2014-10-15 | 11 | 6.2000 | 7.2 | U | U | U |             |

|      |            |    |        |      |   |   |   |                      |
|------|------------|----|--------|------|---|---|---|----------------------|
| 1320 | 2014-10-15 | 12 | 6.2000 | 7.2  | U | U | U |                      |
| 1321 |            |    |        |      |   |   |   |                      |
| 1322 | 2014-10-16 | 10 | 5.5780 | 9.1  | U | U | - |                      |
| 1323 | 2014-10-16 | 11 | 5.5780 | 9.0  | U | - | U |                      |
| 1324 | 2014-10-16 | 12 | 5.5780 | 9.3  | U | U | - |                      |
| 1325 | 2014-10-16 | 13 | 5.4230 | 10.5 | U | - | U |                      |
| 1326 | 2014-10-16 | 14 | 7.1000 | 10.7 | Y | Y | Y |                      |
| 1327 | 2014-10-16 | 15 | 7.1000 | 9.3  | Y | Y | Y |                      |
| 1328 |            |    |        |      |   |   |   |                      |
| 1329 | 2014-10-17 | 10 | 6.9600 | 10.2 | U | U | - |                      |
| 1330 | 2014-10-17 | 11 | 6.9750 | 10.6 | Y | - | Y |                      |
| 1331 | 2014-10-17 | 12 | 6.9750 | 9.8  | U | U | - |                      |
| 1332 | 2014-10-17 | 13 | 6.9750 | 9.2  | Y | - | Y |                      |
| 1333 | 2014-10-17 | 14 | 7.9530 | 9.2  | Y | Y | Y |                      |
| 1334 | 2014-10-17 | 15 | 5.4230 | 7.9  | U | U | U |                      |
| 1335 |            |    |        |      |   |   |   |                      |
| 1336 | 2014-10-18 | 14 | 5.4230 | 7.0  | U | U | U |                      |
| 1337 |            |    |        |      |   |   |   |                      |
| 1338 | 2014-10-19 | 09 | 5.5780 | 6.0  | U | U | - |                      |
| 1339 | 2014-10-19 | 10 | 5.5780 | 6.5  | U | U | - |                      |
| 1340 |            |    |        |      |   |   |   |                      |
| 1341 | 2014-10-20 | 10 | 6.9750 | 8.7  | U | U | - |                      |
| 1342 | 2014-10-20 | 11 | 6.9750 | 8.4  | U | U | - |                      |
| 1343 | 2014-10-20 | 12 | 6.9750 | 7.4  | U | U | - |                      |
| 1344 | 2014-10-20 | 13 | 7.1000 | 9.2  | X | X | X | tune                 |
| 1345 | 2014-10-20 | 16 | 7.1000 | 7.3  | X | X | X | tune                 |
| 1346 |            |    |        |      |   |   |   |                      |
| 1347 | 2014-10-21 | 09 | 6.2000 | 7.0  | X | X | X | tune                 |
| 1348 | 2014-10-21 | 10 | 6.2000 | 6.7  | U | U | U |                      |
| 1349 | 2014-10-21 | 11 | 6.2000 | 7.4  | U | U | U |                      |
| 1350 |            |    |        |      |   |   |   |                      |
| 1351 | 2014-10-23 | 10 | 7.1000 | 9.3  | Y | Y | Y |                      |
| 1352 | 2014-10-23 | 11 | 7.1000 | 8.2  | Y | Y | Y |                      |
| 1353 | 2014-10-23 | 12 | 7.1000 | 8.0  | U | U | U |                      |
| 1354 |            |    |        |      |   |   |   |                      |
| 1355 | 2014-10-24 | 09 | 7.9530 | 8.3  | X | X | X | test                 |
| 1356 | 2014-10-24 | 10 | 7.9530 | 9.8  | Y | U | Y |                      |
| 1357 | 2014-10-24 | 11 | 7.9530 | 10.1 | Y | U | Y |                      |
| 1358 | 2014-10-24 | 12 | 7.9530 | 9.2  | U | U | U |                      |
| 1359 |            |    |        |      |   |   |   |                      |
| 1360 | 2014-10-25 | 09 | 5.4230 | 7.7  | X | X | X | tune                 |
| 1361 | 2014-10-25 | 10 | 5.5780 | 9.1  | U | U | - |                      |
| 1362 | 2014-10-25 | 11 | 5.5780 | 9.0  | U | U | - |                      |
| 1363 | 2014-10-25 | 12 | 5.5780 | 7.9  | U | U | - |                      |
| 1364 | 2014-10-25 | 13 | 5.5780 | 7.8  | U | U | - |                      |
| 1365 | 2014-10-25 | 14 | 5.4230 | 7.9  | U | U | U | disturbed conditions |
| 1366 | 2014-10-25 | 15 | 5.4230 | 7.6  | U | U | U |                      |
| 1367 | 2014-10-25 | 16 | 5.4230 | 5.8  | X | X | X | tune                 |
| 1368 | 2014-10-25 | 17 | 5.4230 | 5.8  | X | X | X |                      |
| 1369 |            |    |        |      |   |   |   |                      |
| 1370 | 2014-10-26 | 08 | 6.7700 | 7.9  | U | U | U |                      |
| 1371 | 2014-10-26 | 09 | 7.1000 | 8.5  | U | U | U |                      |
| 1372 | 2014-10-26 | 10 | 6.9750 | 9.4  | Y | Y | - |                      |
| 1373 | 2014-10-26 | 11 | 6.9750 | 10.3 | Y | Y | - |                      |
| 1374 | 2014-10-26 | 12 | 6.9750 | 9.5  | Y | Y | - |                      |
| 1375 | 2014-10-26 | 13 | 6.9750 | 8.8  | U | U | - |                      |
| 1376 |            |    |        |      |   |   |   |                      |
| 1377 | 2014-10-27 | 10 | 6.9750 | 12.3 | U | U | - |                      |
| 1378 | 2014-10-27 | 11 | 5.5780 | 11.5 | U | U | - | disturbed conditions |
| 1379 | 2014-10-27 | 13 | 6.9750 | 10.2 | Y | Y | - |                      |
| 1380 |            |    |        |      |   |   |   |                      |
| 1381 | 2014-11-10 | 16 | 6.7700 | 6.3  | X | X | X | test                 |
| 1382 | 2014-11-10 | 17 | 6.7700 | 7.5  | X | X | X | test                 |
| 1383 | 2014-11-10 | 18 | 5.4230 | 5.0  | X | X | X | test                 |
| 1384 |            |    |        |      |   |   |   |                      |
| 1385 | 2014-11-11 | 10 | 7.9530 | 9.7  | X | X | X | test                 |

|      |            |    |        |      |       |                           |
|------|------------|----|--------|------|-------|---------------------------|
| 1386 | 2014-11-11 | 13 | 7.1000 | NaN  | X X X | test                      |
| 1387 | 2014-11-11 | 14 | 6.7700 | 8.4  | X X X | test                      |
| 1388 |            |    |        |      |       |                           |
| 1389 | 2014-11-12 | 10 | 7.9530 | 10.9 | U U   | - radar scanning          |
| 1390 | 2014-11-12 | 11 | 7.9530 | 10.8 | U U   | -                         |
| 1391 | 2014-11-12 | 12 | 7.9530 | 10.3 | U U   | -                         |
| 1392 | 2014-11-12 | 13 | 7.1000 | 9.7  | U U   | -                         |
| 1393 | 2014-11-12 | 14 | 7.9530 | 9.2  | Y -   | Y very brief O-mode (5 s) |
| 1394 | 2014-11-12 | 15 | 6.2000 | 8.9  | Y -   | Y                         |
| 1395 | 2014-11-12 | 17 | 5.4231 | 4.8  | X X X | tune                      |
| 1396 |            |    |        |      |       |                           |
| 1397 | 2014-11-13 | 12 | 7.9391 | 9.7  | U U   | -                         |
| 1398 | 2014-11-13 | 13 | 6.7561 | 9.0  | Y Y   | -                         |
| 1399 | 2014-11-13 | 14 | 6.2000 | 8.3  | Y -   | Y very brief O-mode (5 s) |
| 1400 | 2014-11-13 | 15 | 5.4230 | 6.5  | Y -   | Y                         |
| 1401 | 2014-11-13 | 16 | 5.4230 | 5.8  | X X X | no radar                  |
| 1402 |            |    |        |      |       |                           |
| 1403 | 2014-11-14 | 14 | 5.4230 | 7.0  | Y -   | Y very brief O-mode (5 s) |
| 1404 | 2014-11-14 | 15 | 5.4230 | 5.7  | X X X | no radar                  |
| 1405 |            |    |        |      |       |                           |
| 1406 | 2014-11-17 | 08 | 5.4231 | 8.3  | U U   | -                         |
| 1407 | 2014-11-17 | 09 | 7.0861 | 8.5  | Y Y   | -                         |
| 1408 | 2014-11-17 | 10 | 7.9530 | 9.5  | X X X |                           |
| 1409 | 2014-11-17 | 11 | 7.9530 | 10.9 | X X X |                           |
| 1410 | 2014-11-17 | 12 | 7.9530 | 9.0  | X X X |                           |
| 1411 |            |    |        |      |       |                           |
| 1412 | 2014-11-18 | 08 | 6.7700 | 7.8  | U U   | -                         |
| 1413 | 2014-11-18 | 09 | 6.7700 | 10.2 | X X X | PMWE                      |
| 1414 | 2014-11-18 | 10 | 7.9530 | 10.2 | X X X |                           |
| 1415 | 2014-11-18 | 11 | 7.9530 | 9.9  | X X X |                           |
| 1416 | 2014-11-18 | 12 | 7.9530 | 9.0  | X X X |                           |
| 1417 | 2014-11-18 | 13 | 5.4230 | 0.0  | X X X |                           |
| 1418 |            |    |        |      |       |                           |
| 1419 | 2014-11-19 | 08 | 6.1999 | 7.2  | U U   | -                         |
| 1420 | 2014-11-19 | 09 | 6.1999 | 8.5  | Y Y   | -                         |
| 1421 | 2014-11-19 | 10 | 6.2000 | 9.0  | X X X | short pulses              |
| 1422 | 2014-11-19 | 11 | 6.2000 | 9.7  | X X X |                           |
| 1423 | 2014-11-19 | 12 | 6.2000 | 9.2  | X X X |                           |
| 1424 |            |    |        |      |       |                           |
| 1425 | 2014-11-20 | 08 | 6.7700 | 7.3  | X X X | PMWE                      |
| 1426 | 2014-11-20 | 09 | 6.7700 | 8.3  | X X X |                           |
| 1427 | 2014-11-20 | 11 | 7.9530 | 9.6  | X X X |                           |
| 1428 | 2014-11-20 | 12 | 7.9530 | 9.2  | X X X |                           |
| 1429 | 2014-11-20 | 13 | 5.3000 | 9.3  | X X X |                           |
| 1430 |            |    |        |      |       |                           |
| 1431 | 2014-11-21 | 08 | 6.7700 | 7.8  | X X X | PMWE                      |
| 1432 | 2014-11-21 | 09 | 6.7700 | 8.8  | X X X |                           |
| 1433 | 2014-11-21 | 10 | 7.9530 | 11.0 | X X X |                           |
| 1434 | 2014-11-21 | 14 | 5.4238 | 6.1  | Q Q Q |                           |
| 1435 |            |    |        |      |       |                           |
| 1436 | 2014-11-23 | 10 | 6.7700 | 10.6 | X X X | PMWE                      |
| 1437 | 2014-11-23 | 11 | 6.7700 | 10.8 | X X X |                           |
| 1438 |            |    |        |      |       |                           |
| 1439 | 2014-11-24 | 09 | 6.7700 | 9.0  | X X X | PMWE                      |
| 1440 | 2014-11-24 | 10 | 6.7700 | 10.5 | X X X |                           |
| 1441 | 2014-11-24 | 11 | 6.2000 | 11.4 | X X X | short pulses              |
| 1442 | 2014-11-24 | 12 | 6.2000 | 9.4  | X X X |                           |
| 1443 | 2014-11-24 | 13 | 6.2000 | 9.1  | X X X |                           |
| 1444 | 2014-11-24 | 14 | 5.4230 | 6.2  | U U   | - disturbed conditions    |
| 1445 |            |    |        |      |       |                           |
| 1446 | 2014-11-25 | 10 | 5.3000 | 8.9  | X X X | test                      |
| 1447 | 2014-11-25 | 11 | 6.3000 | 9.2  | U U   | - radar scanning          |
| 1448 | 2014-11-25 | 12 | 6.3000 | 9.2  | U U U |                           |
| 1449 | 2014-11-25 | 13 | 6.3000 | 8.4  | U U U |                           |
| 1450 | 2014-11-25 | 14 | 5.3500 | 6.7  | U U   | -                         |
| 1451 |            |    |        |      |       |                           |

|      |            |    |        |      |       |                      |
|------|------------|----|--------|------|-------|----------------------|
| 1452 | 2014-11-26 | 10 | 6.3000 | 8.5  | X X X | short pulses         |
| 1453 | 2014-11-26 | 11 | 6.3000 | 8.9  | X X X |                      |
| 1454 | 2014-11-26 | 12 | 6.3000 | 8.9  | X X X |                      |
| 1455 | 2014-11-26 | 13 | 5.4230 | 8.1  | X X X |                      |
| 1456 |            |    |        |      |       |                      |
| 1457 | 2014-11-27 | 10 | 6.3000 | 10.1 | Y Y - |                      |
| 1458 | 2014-11-27 | 11 | 6.3000 | 10.2 | Y Y Y |                      |
| 1459 | 2014-11-27 | 12 | 6.3000 | 10.5 | Y Y Y |                      |
| 1460 | 2014-11-27 | 13 | 5.4230 | 9.1  | Y Y Y |                      |
| 1461 | 2014-11-27 | 14 | 5.4230 | 7.5  | Y Y U |                      |
| 1462 |            |    |        |      |       |                      |
| 1463 | 2014-11-28 | 10 | 6.3000 | 10.6 | X X X | test                 |
| 1464 | 2014-11-28 | 11 | 6.3000 | 10.5 | Q Q Q | "lace" program       |
| 1465 | 2014-11-28 | 12 | 6.3000 | 9.0  | Q Q Q |                      |
| 1466 | 2014-11-28 | 13 | 6.3000 | 7.6  | Q Q Q |                      |
| 1467 |            |    |        |      |       |                      |
| 1468 | 2014-11-29 | 10 | 6.2999 | 10.4 | X X X | no radar             |
| 1469 | 2014-11-29 | 11 | 6.2999 | 10.6 | X X X |                      |
| 1470 | 2014-11-29 | 12 | 5.3000 | 9.5  | X X X | test?                |
| 1471 |            |    |        |      |       |                      |
| 1472 | 2014-12-04 | 09 | 6.3000 | 9.0  | X X X | short pulses         |
| 1473 | 2014-12-04 | 10 | 7.1000 | 9.0  | X X X |                      |
| 1474 | 2014-12-10 | 10 | 6.3000 | 7.4  | X X X | short pulses         |
| 1475 | 2014-12-10 | 11 | 6.3000 | 8.4  | X X X |                      |
| 1476 | 2014-12-10 | 12 | 6.3000 | 8.9  | X X X |                      |
| 1477 | 2014-12-10 | 13 | 6.3000 | 7.0  | X X X |                      |
| 1478 |            |    |        |      |       |                      |
| 1479 | 2015-03-10 | 15 | 7.1000 | 9.0  | Y Y - |                      |
| 1480 | 2015-03-10 | 16 | 7.1000 | 9.0  | Y Y - |                      |
| 1481 | 2015-03-10 | 17 | 6.2000 | 8.4  | Y Y - |                      |
| 1482 | 2015-03-10 | 18 | 5.4230 | 6.8  | U U - |                      |
| 1483 |            |    |        |      |       |                      |
| 1484 | 2015-03-11 | 15 | 5.4230 | 5.8  | U U - | disturbed conditions |
| 1485 |            |    |        |      |       |                      |
| 1486 | 2015-03-12 | 07 | 5.4230 | 6.0  | X X X | short pulses         |
| 1487 | 2015-03-12 | 08 | 5.4230 | 6.7  | X X X |                      |
| 1488 | 2015-03-12 | 15 | 6.2000 | 6.7  | U U - |                      |
| 1489 | 2015-03-12 | 16 | 5.4230 | 4.8  | U U - |                      |
| 1490 |            |    |        |      |       |                      |
| 1491 | 2015-03-13 | 15 | 6.2000 | 7.3  | U U - |                      |
| 1492 | 2015-03-13 | 16 | 6.2000 | 7.1  | Y Y - |                      |
| 1493 | 2015-03-13 | 17 | 5.4230 | 5.9  | Y Y - |                      |
| 1494 |            |    |        |      |       |                      |
| 1495 | 2015-03-14 | 15 | 7.1000 | 8.4  | Y Y - |                      |
| 1496 | 2015-03-14 | 16 | 7.1000 | 7.9  | Y Y - |                      |
| 1497 | 2015-03-14 | 17 | 5.4230 | 7.0  | Y Y - |                      |
| 1498 |            |    |        |      |       |                      |
| 1499 | 2015-04-14 | 09 | 6.7700 | 8.8  | X X X | tune                 |
| 1500 | 2015-04-14 | 10 | 7.0000 | 8.4  | Y Y - |                      |
| 1501 | 2015-04-14 | 11 | 7.0000 | 8.5  | Y Y - |                      |
| 1502 | 2015-04-14 | 12 | 7.0000 | 8.4  | Y Y - |                      |
| 1503 | 2015-04-14 | 13 | 7.0000 | 8.1  | Y Y - |                      |
| 1504 |            |    |        |      |       |                      |
| 1505 | 2015-04-15 | 09 | 5.4230 | 6.7  | X X X | tune                 |
| 1506 | 2015-04-15 | 10 | 5.6000 | 6.7  | U U - |                      |
| 1507 | 2015-04-15 | 11 | 5.6000 | 6.8  | U U - |                      |
| 1508 |            |    |        |      |       |                      |
| 1509 | 2015-04-16 | 12 | 5.6000 | 5.8  | Q Q Q |                      |
| 1510 | 2015-04-16 | 15 | 5.5500 | 7.0  | U U - |                      |
| 1511 | 2015-04-16 | 16 | 5.5500 | 5.9  | U U - |                      |
| 1512 |            |    |        |      |       |                      |
| 1513 | 2015-04-20 | 10 | 5.6000 | 7.6  | U U - |                      |
| 1514 | 2015-04-20 | 11 | 5.6000 | 7.5  | U U - |                      |
| 1515 | 2015-04-20 | 12 | 7.0000 | 7.6  | Y Y - |                      |
| 1516 | 2015-04-20 | 13 | 7.0000 | 7.2  | Y Y - |                      |
| 1517 |            |    |        |      |       |                      |



1518 2015-04-22 10 7.0000 8.2 U U -  
1519 2015-04-22 11 7.0000 8.2 U U -  
1520 2015-04-22 12 7.0000 8.4 Y Y -  
1521 2015-04-22 13 5.6000 8.5 Y Y -  
1522 2015-04-22 14 5.6000 8.2 X X X expt stopped at 14 UT.  
1523  
1524 2015-04-23 10 5.6000 8.2 U U -  
1525 2015-04-23 11 5.6000 8.6 U U -  
1526 2015-04-23 12 7.0000 8.5 U U -  
1527 2015-04-23 13 7.0000 8.5 U U -  
1528  
1529 2015-04-24 10 5.6000 8.2 Y Y -  
1530 2015-04-24 11 7.0000 8.1 Y Y -  
1531 2015-04-24 12 7.0000 7.6 Y Y -  
1532  
1533 2015-04-27 11 7.0000 9.2 Y Y -  
1534 2015-04-27 12 7.0000 9.5 Y Y -  
1535 2015-04-27 13 7.0000 8.8 U U -  
1536  
1537 2015-07-02 08 5.3000 7.0 X X X tune  
1538 2015-07-02 09 6.2000 7.4 U U -  
1539  
1540 2015-07-03 08 6.7700 7.4 X X X PMSE  
1541 2015-07-03 09 6.7700 7.4 X X X  
1542 2015-07-03 10 6.7700 7.3 X X X  
1543 2015-07-03 11 6.7700 6.8 X X X  
1544 2015-07-03 12 6.7700 6.6 X X X  
1545  
1546 2015-07-06 09 6.7700 6.3 X X X PMSE  
1547 2015-07-06 10 6.7700 6.8 X X X  
1548 2015-07-06 11 6.7700 6.7 X X X  
1549  
1550 2015-07-07 08 6.7700 6.7 X X X PMSE  
1551 2015-07-07 09 6.7700 7.6 X X X  
1552 2015-07-07 10 5.4230 6.7 U U -  
1553 2015-07-07 12 6.7700 6.8 X X X PMSE  
1554  
1555 2015-07-08 07 6.7700 7.4 X X X PMSE  
1556 2015-07-08 08 6.2000 7.4 U U -  
1557 2015-07-08 09 6.7700 7.5 X X X PMSE  
1558 2015-07-08 10 6.7700 7.0 X X X  
1559 2015-07-08 11 6.7700 7.0 X X X  
1560  
1561 2015-07-09 07 6.7700 7.4 X X X PMSE  
1562 2015-07-09 08 6.7700 6.9 X X X  
1563 2015-07-09 09 6.7700 6.9 X X X  
1564 2015-07-09 10 6.7700 6.7 X X X  
1565 2015-07-09 11 6.7700 6.4 X X X  
1566  
1567 2015-07-10 08 6.7700 7.1 X X X PMSE  
1568 2015-07-10 09 6.7700 7.1 X X X  
1569 2015-07-10 12 6.7700 6.3 X X X  
1570  
1571 2015-07-13 10 6.7700 6.7 X X X PMSE  
1572 2015-07-13 11 6.7700 8.2 X X X  
1573  
1574 2015-09-23 18 5.4230 10.0 X X X tune  
1575 2015-09-23 19 6.7700 8.5 X X X  
1576 2015-09-24 09 5.4230 5.5 U U -  
1577 2015-09-24 11 5.4230 5.7 U U U  
1578 2015-09-24 12 5.4230 5.5 U U U  
1579  
1580 2015-09-25 08 5.4230 5.4 U U -  
1581 2015-09-25 12 5.4230 6.7 U U -  
1582  
1583 2015-09-28 07 5.4230 7.1 U U -

|      |            |    |        |      |   |   |                        |
|------|------------|----|--------|------|---|---|------------------------|
| 1584 | 2015-09-28 | 08 | 6.2000 | 7.5  | U | U | -                      |
| 1585 | 2015-09-28 | 09 | 6.7700 | 7.4  | U | U | -                      |
| 1586 |            |    |        |      |   |   |                        |
| 1587 | 2015-10-21 | 09 | 6.7700 | 8.2  | X | X | X tune                 |
| 1588 | 2015-10-21 | 10 | 7.0000 | 9.1  | Y | Y | -                      |
| 1589 | 2015-10-21 | 11 | 7.0000 | 9.1  | Y | Y | -                      |
| 1590 | 2015-10-21 | 12 | 7.0000 | 8.3  | Y | Y | -                      |
| 1591 |            |    |        |      |   |   |                        |
| 1592 | 2015-10-23 | 10 | 7.0000 | 8.3  | Y | Y | -                      |
| 1593 | 2015-10-23 | 11 | 7.0000 | 8.5  | Y | Y | -                      |
| 1594 | 2015-10-23 | 12 | 7.0000 | 9.2  | Y | Y | -                      |
| 1595 |            |    |        |      |   |   |                        |
| 1596 | 2015-10-24 | 10 | 7.0000 | 9.0  | Y | Y | -                      |
| 1597 | 2015-10-24 | 11 | 7.0000 | 9.0  | Y | Y | -                      |
| 1598 | 2015-10-24 | 12 | 7.0000 | 8.8  | Y | Y | -                      |
| 1599 | 2015-10-24 | 13 | 7.0000 | 8.7  | Y | Y | -                      |
| 1600 |            |    |        |      |   |   |                        |
| 1601 | 2015-10-25 | 10 | 7.0000 | 10.1 | Y | Y | -                      |
| 1602 | 2015-10-25 | 11 | 7.0000 | 9.9  | Y | Y | -                      |
| 1603 | 2015-10-25 | 12 | 7.0000 | 9.4  | Y | Y | -                      |
| 1604 | 2015-10-25 | 13 | 7.0000 | 8.9  | Y | Y | -                      |
| 1605 |            |    |        |      |   |   |                        |
| 1606 | 2015-10-26 | 09 | 5.4230 | 8.9  | X | X | X tune                 |
| 1607 | 2015-10-26 | 10 | 5.6000 | 9.4  | Y | Y | - (but not strong)     |
| 1608 | 2015-10-26 | 11 | 5.6000 | 9.0  | Y | Y | -                      |
| 1609 | 2015-10-26 | 12 | 5.6000 | 9.2  | Y | Y | -                      |
| 1610 | 2015-10-26 | 13 | 5.6000 | 8.3  | Y | Y | -                      |
| 1611 |            |    |        |      |   |   |                        |
| 1612 | 2015-10-28 | 12 | 6.7700 | 10.4 | X | X | X tune                 |
| 1613 | 2015-10-28 | 13 | 7.9530 | 9.2  | Y | Y | Y                      |
| 1614 | 2015-10-28 | 14 | 6.7700 | 9.0  | Y | Y | Y                      |
| 1615 | 2015-10-28 | 15 | 5.4230 | 7.1  | Y | Y | Y                      |
| 1616 | 2015-10-28 | 16 | 5.4230 | 6.0  | Y | - | Y                      |
| 1617 |            |    |        |      |   |   |                        |
| 1618 | 2015-10-29 | 11 | 7.1000 | 10.0 | X | X | X tune                 |
| 1619 | 2015-10-29 | 12 | 6.2000 | 10.4 | X | X | X                      |
| 1620 | 2015-10-29 | 13 | 7.9530 | 9.0  | Y | U | Y                      |
| 1621 | 2015-10-29 | 14 | 5.4230 | 7.6  | Y | - | Y                      |
| 1622 | 2015-10-29 | 15 | 5.4230 | 6.7  | Y | - | Y                      |
| 1623 | 2015-10-29 | 16 | 5.4230 | 6.3  | Y | - | Y                      |
| 1624 |            |    |        |      |   |   |                        |
| 1625 | 2015-10-30 | 08 | 6.2000 | 7.4  | X | X | X tune                 |
| 1626 | 2015-10-30 | 09 | 6.2000 | 8.0  | Y | Y | -                      |
| 1627 | 2015-10-30 | 10 | 7.1000 | 8.5  | Y | - | Y                      |
| 1628 | 2015-10-30 | 11 | 7.1000 | 9.5  | Y | Y | Y                      |
| 1629 | 2015-10-30 | 12 | 7.9530 | 9.6  | Y | Y | Y                      |
| 1630 |            |    |        |      |   |   |                        |
| 1631 | 2015-10-31 | 11 | 7.1000 | 9.3  | X | X | X tune                 |
| 1632 | 2015-10-31 | 12 | 5.4230 | 8.5  | X | X | X                      |
| 1633 | 2015-10-31 | 13 | 7.1000 | 7.2  | Y | Y | Y                      |
| 1634 | 2015-10-31 | 14 | 5.3000 | 7.0  | Y | Y | Y                      |
| 1635 |            |    |        |      |   |   |                        |
| 1636 | 2015-11-02 | 11 | 5.4230 | 8.2  | X | X | X tune                 |
| 1637 | 2015-11-02 | 12 | 5.4230 | 8.9  | X | X | X                      |
| 1638 | 2015-11-02 | 13 | 6.7700 | 7.8  | Y | Y | U                      |
| 1639 |            |    |        |      |   |   |                        |
| 1640 | 2015-11-03 | 10 | 6.7700 | 9.3  | Y | Y | U                      |
| 1641 | 2015-11-03 | 11 | 6.3000 | 9.4  | U | - | U                      |
| 1642 |            |    |        |      |   |   |                        |
| 1643 | 2015-11-05 | 11 | 6.7700 | 8.4  | U | U | U disturbed conditions |
| 1644 | 2015-11-05 | 12 | 5.4230 | 7.6  | U | U | -                      |
| 1645 |            |    |        |      |   |   |                        |
| 1646 | 2015-11-06 | 11 | 5.3000 | 6.4  | U | U | U                      |
| 1647 | 2015-11-06 | 12 | 5.3000 | 6.4  | U | U | U                      |
| 1648 | 2015-11-06 | 13 | 5.3000 | 5.6  | U | U | -                      |
| 1649 |            |    |        |      |   |   |                        |

|      |            |    |        |      |   |   |   |                        |
|------|------------|----|--------|------|---|---|---|------------------------|
| 1650 | 2015-11-09 | 14 | 5.4230 | 11.6 | U | U | - | disturbed conditions   |
| 1651 | 2015-11-09 | 15 | 5.4230 | 12.4 | U | U | - |                        |
| 1652 |            |    |        |      |   |   |   |                        |
| 1653 | 2015-11-16 | 10 | 5.4230 | 6.4  | U | U | - |                        |
| 1654 | 2015-11-16 | 11 | 5.4230 | 7.3  | U | U | - |                        |
| 1655 | 2015-11-16 | 12 | 5.4230 | 7.1  | U | U | - |                        |
| 1656 |            |    |        |      |   |   |   |                        |
| 1657 | 2015-11-18 | 10 | 6.7700 | 7.9  | U | U | - |                        |
| 1658 | 2015-11-18 | 12 | 6.7700 | 9.2  | U | U | - |                        |
| 1659 | 2015-11-18 | 13 | 5.4230 | 8.4  | U | U | - |                        |
| 1660 |            |    |        |      |   |   |   |                        |
| 1661 | 2015-11-26 | 11 | 6.2000 | 7.0  | U | U | - |                        |
| 1662 | 2015-11-26 | 12 | 5.3000 | 6.7  | U | U | - |                        |
| 1663 |            |    |        |      |   |   |   |                        |
| 1664 | 2015-11-27 | 11 | 6.2000 | 7.0  | U | U | - |                        |
| 1665 | 2015-11-27 | 12 | 5.4230 | 6.6  | U | U | - |                        |
| 1666 |            |    |        |      |   |   |   |                        |
| 1667 | 2015-12-04 | 11 | 5.4230 | 6.0  | U | - | U | radar scanning         |
| 1668 | 2015-12-04 | 12 | 5.4230 | 5.8  | U | U | U |                        |
| 1669 |            |    |        |      |   |   |   |                        |
| 1670 | 2016-03-04 | 13 | 6.2000 | 7.1  | X | X | X | tune                   |
| 1671 | 2016-03-04 | 14 | 6.9600 | 8.1  | Y | U | Y |                        |
| 1672 | 2016-03-04 | 15 | 6.2000 | 7.8  | Y | U | Y |                        |
| 1673 | 2016-03-04 | 16 | 6.2000 | 6.0  | Y | Y | Y |                        |
| 1674 |            |    |        |      |   |   |   |                        |
| 1675 | 2016-03-09 | 10 | 5.3600 | 6.6  | U | U | - |                        |
| 1676 | 2016-03-09 | 11 | 5.3600 | 7.1  | U | U | - |                        |
| 1677 | 2016-03-09 | 12 | 5.3600 | 7.0  | U | U | - |                        |
| 1678 |            |    |        |      |   |   |   |                        |
| 1679 | 2016-03-10 | 10 | 5.3000 | 6.3  | U | U | - |                        |
| 1680 | 2016-03-10 | 11 | 5.3000 | 6.2  | U | U | - |                        |
| 1681 | 2016-03-10 | 12 | 5.3000 | 6.3  | U | U | - |                        |
| 1682 |            |    |        |      |   |   |   |                        |
| 1683 | 2016-03-11 | 10 | 5.3600 | 6.1  | U | U | - |                        |
| 1684 | 2016-03-11 | 11 | 5.3600 | 6.1  | U | U | - |                        |
| 1685 | 2016-03-11 | 12 | 5.3600 | 6.6  | U | U | - |                        |
| 1686 |            |    |        |      |   |   |   |                        |
| 1687 | 2016-04-22 | 08 | 4.0400 | 5.5  | X | X | X | test                   |
| 1688 | 2016-04-22 | 12 | 5.3000 | 5.7  | X | X | X |                        |
| 1689 |            |    |        |      |   |   |   |                        |
| 1690 | 2016-09-23 | 10 | 5.2000 | 6.1  | X | X | X | tune                   |
| 1691 |            |    |        |      |   |   |   |                        |
| 1692 | 2016-09-24 | 11 | 5.9000 | 6.6  | U | U | - |                        |
| 1693 | 2016-09-24 | 12 | 5.6000 | 6.2  | U | U | - |                        |
| 1694 | 2016-09-24 | 13 | 5.3000 | 5.8  | U | U | - |                        |
| 1695 | 2016-09-24 | 14 | 5.3000 | 5.6  | U | U | - |                        |
| 1696 |            |    |        |      |   |   |   |                        |
| 1697 | 2016-10-12 | 11 | 5.4230 | 6.4  | X | X | X | tune                   |
| 1698 | 2016-10-12 | 12 | 5.6000 | 6.1  | X | X | X | short pulses           |
| 1699 | 2016-10-13 | 10 | 6.9600 | 8.9  | X | X | X | tune                   |
| 1700 | 2016-10-13 | 11 | 6.7700 | 7.0  | X | X | X | short pulses           |
| 1701 | 2016-10-20 | 11 | 5.4230 | 6.1  | X | X | X | tune                   |
| 1702 | 2016-10-20 | 12 | 5.4230 | 6.0  | Q | Q | Q |                        |
| 1703 | 2016-10-20 | 13 | 5.3000 | 5.7  | Q | Q | Q | but WAILES on A2 later |
| 1704 |            |    |        |      |   |   |   |                        |
| 1705 | 2017-07-10 | 18 | 5.4230 | 4.8  | X | X | X | API                    |
| 1706 | 2017-07-10 | 19 | 5.4230 | 4.7  | X | X | X |                        |
| 1707 | 2017-07-11 | 06 | 5.4230 | 5.4  | X | X | X | API                    |
| 1708 | 2017-07-11 | 09 | 5.4230 | 0.0  | X | X | X |                        |
| 1709 |            |    |        |      |   |   |   |                        |
| 1710 | 2017-10-18 | 10 | 4.0400 | 5.9  | Q | Q | Q |                        |
| 1711 | 2017-10-18 | 11 | 5.4230 | 6.4  | Q | Q | Q |                        |
| 1712 | 2017-10-18 | 12 | 5.4230 | 5.6  | Q | Q | Q |                        |
| 1713 | 2017-10-18 | 13 | 5.4230 | 5.2  | Q | Q | Q |                        |
| 1714 | 2017-10-18 | 14 | 5.4230 | 4.7  | Q | Q | Q |                        |
| 1715 | 2017-10-19 | 10 | 5.5400 | 6.8  | Q | Q | Q |                        |
